# Supplementary material for: Ubiquitin-proteasome system controls ciliogenesis at the initial step of axoneme extension
Source: PubMed Central journal article supplement (PMC4205846; doi:10.1038/ncomms6081), 2014-10-01
Supplement: ncomms6081-s1.pdf [file ncomms6081-s1.pdf]

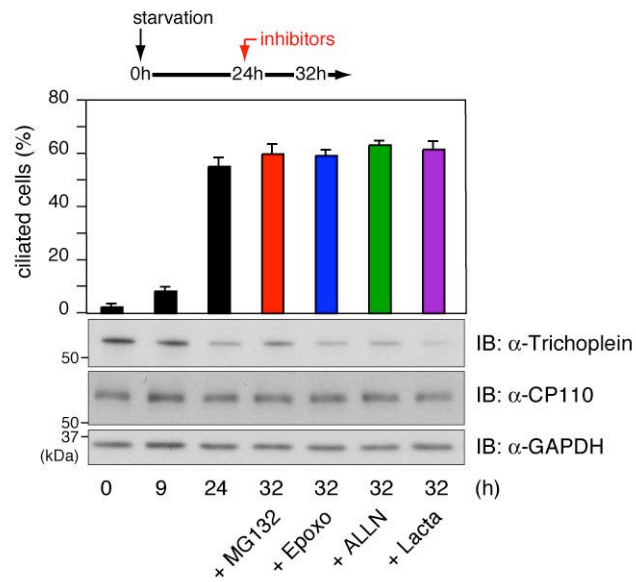

**Supplementary Figure 1 | Effect of proteasome inhibitors on ciliogenesis.** After 24 h serum starvation, RPE1 cells were treated with proteasome inhibitors (MG132, Epoxomicin [Epoxo], ALLN and Lactacystin [Lacta]) for 8 h as shown in the experimental scheme. Percentages of ciliated cells (mean  $\pm$  s.e.m. from three independent experiments,  $n > 200$  each) and immunoblotting analysis of trichoplein, CP110 and GAPDH are shown.

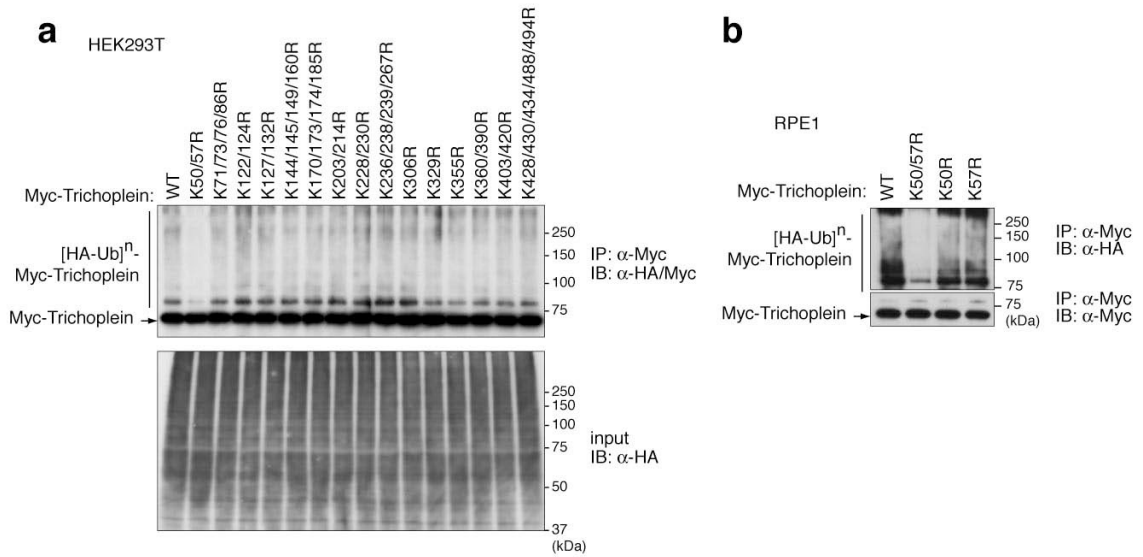

**Supplementary Figure 2 | K50/57R mutation attenuated trichoplein polyubiquitylation.** (a) Wild-type myc-trichoplein (WT) or its mutants were co-expressed with HA-ubiquitin in HEK293T cells. After treatment with MG132 for 6 h, cells were subjected to *in vivo* ubiquitylation assays. (b) Myc-trichoplein WT or its mutants were co-expressed with HA-ubiquitin in RPE1 cells. After treatment with MG132 for 6 h in the absence of serum, cells were subjected to *in vivo* ubiquitylation assays.

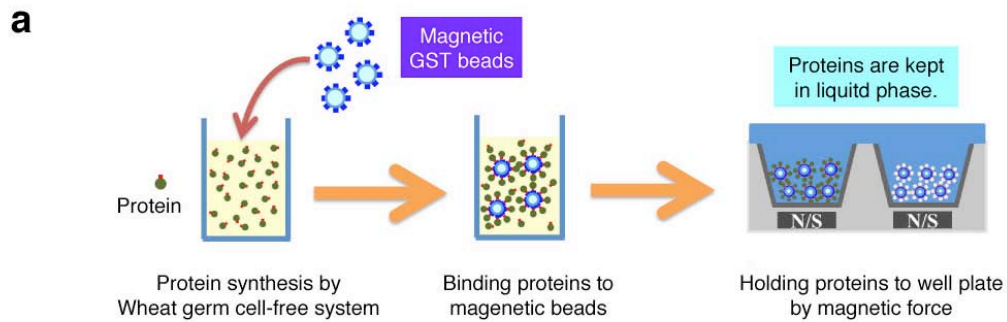

**b** MBP-Trichoplein-binding proteins

|                         | gene symbol   | FLJ no.          |                                                               |
|-------------------------|---------------|------------------|---------------------------------------------------------------|
| 10 potential E3 ligases | RC3H2         | 23389AAAN        | Ring finger and CCCH-type zinc finger domain 2                |
|                         | ZBTB41        | 36199AAAN        | Zinc finger and BTB domain containing 41                      |
|                         | RNF19A        | 23417AAAN        | Ring finger protein19A                                        |
|                         | CUL7          | 76468AAAN        | Cullin 7                                                      |
|                         | RNF165        | 45559AAAN        | Ring finger protein 165                                       |
|                         | ZTB40         | 37954AAAN        | Zinc finger and BTB domain containing 40                      |
|                         | NUP43         | 16491AAAN        | Nucleoporin 43kDa                                             |
|                         | ZBTB44        | 95555AAAF        | Zinc finger and BTB domain containing 44                      |
|                         | <b>KCTD17</b> | <b>12242AAAN</b> | <b>Potassium channel tetramerization domain containing 17</b> |
|                         | RABGEF1       | 10840AAAN        | Rab guanine nucleotide exchange factor (GEF) 1                |
| positive control        | AURKA         | 80023AAAF        | Inoko A et al, J Cell Biol, 197: 391-405 (2012)               |
|                         | KRT18         | 26076AAAF        | Nishizawa M et al, J Cell Sci, 118: 1081-1090 (2005)          |
|                         | ODF2          |                  | Ibi M et al, J Cell Sci, 124: 857-864 (2011)                  |

**Supplementary Figure 3 | Screening for E3 ligases that involve in trichoplein polyubiquitylation and ciliogenesis.** (a) Experimental scheme of protein array; see “Methods” section in details. (b) Ten E3 ligases identified as MBP-trichoplein-interacting proteins are shown. This system could detect interactions between MBP-trichoplein and the known trichoplein-interacting protein, such as Aurora-A (AURKA)<sup>1</sup>, Keratin-18 (KRT18)<sup>2</sup> and Odf2 (ODF2)<sup>3</sup>.

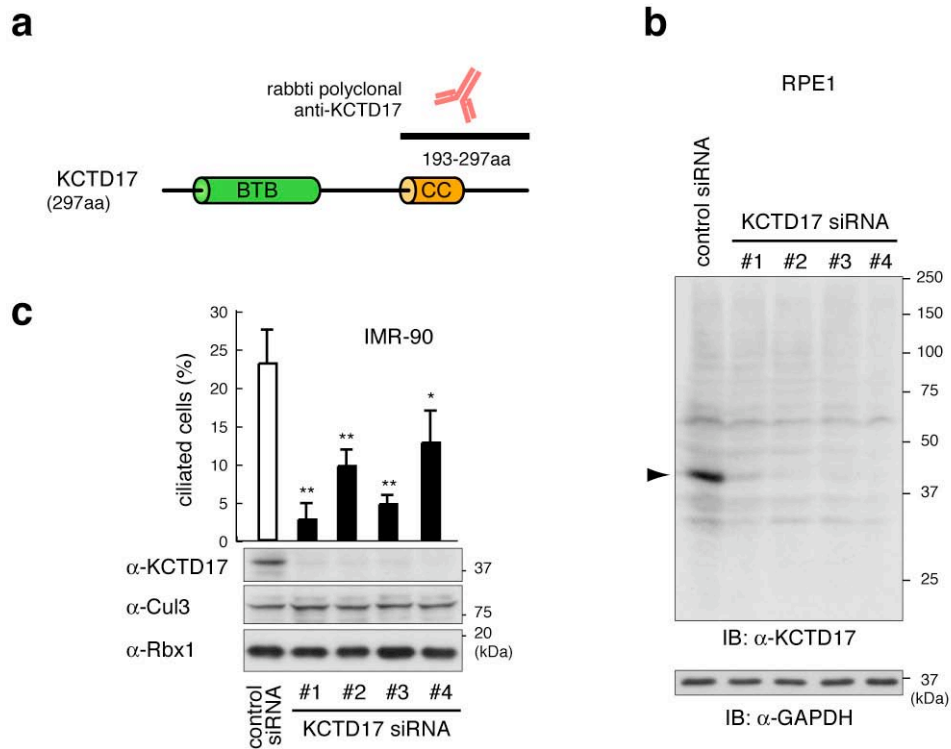

**Supplementary Figure 4 | Depletion of KCTD17 protein blocks ciliogenesis.** (a,b) Bacterially purified KCTD17 fragment (193-297aa) was immunized for production of rabbit polyclonal anti-KCTD17 antibody. This antibody specifically detected KCTD17 in control (control siRNA) but not KCTD17-depleted (KCTD17 siRNA #1-4) RPE1 cells by immunoblotting analysis in (b). (c) Effect of KCTD17 depletion on ciliogenesis in IMR-90 fibroblasts subjected to 24 h serum starvation. Percentages of ciliated cells (mean  $\pm$  s.e.m. from three indicated experiments,  $n > 100$  each) are shown in top.  $p^{**} < 0.01$ ,  $0.01 < p^* < 0.05$ , two-tailed unpaired student's  $t$ -tests.

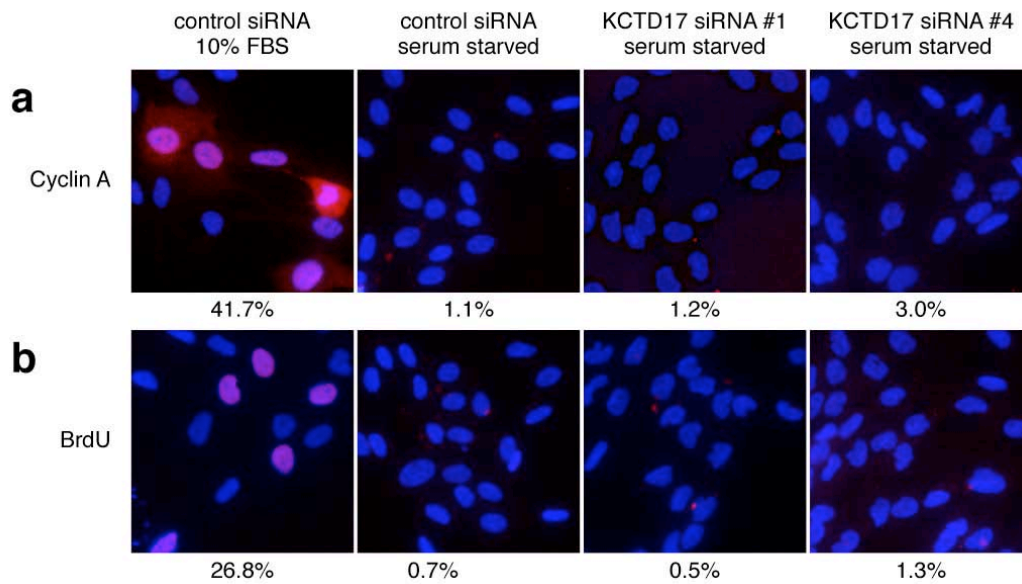

**Supplementary Figure 5 | Immunofluorescence analysis of cell cycle markers in KCTD17-depleted cells.** RPE1 cells transfected with control or KCTD17 siRNAs (#1 or #4) were cultured for normal medium (10% FBS) or subjected to 24 h serum starvation. Representative confocal images of cyclin A (**a**, red) or incorporated BrdU (**b**, red) with DNA (blue) and percentages of positive cells are shown (mean values from three-independent experiments, n > 200 each).

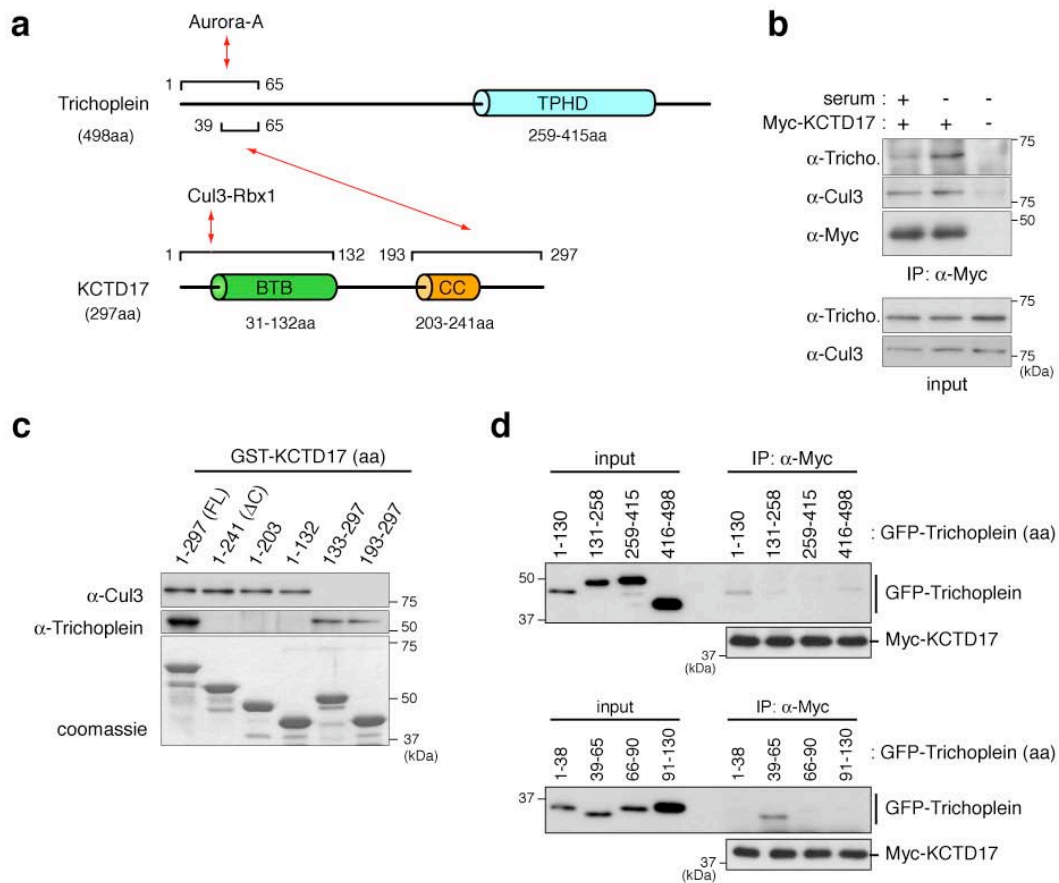

### Supplementary Figure 6 | KCTD17 interacts with trichoplein and Cul3.

(a) A summary of the established interactions of KCTD17, Cul3, trichoplein and Aurora-A. (b) Co-immunoprecipitation assays show Myc-KCTD17 interaction with trichoplein and Cul3 in Tet-On RPE1 cells. Myc-KCTD17 expression was induced by Dox treatment (indicated by a plus sign). (c) Pull-down assays using bacterially purified GST-tagged KCTD17 truncation mutants with RPE1 cell extract. KCTD17 interactions with Cul3 and trichoplein are shown by immunoblotting analysis. (d) Interactions between GFP-trichoplein mutants and Myc-KCTD17 were analyzed by co-immunoprecipitation assays with anti-Myc.

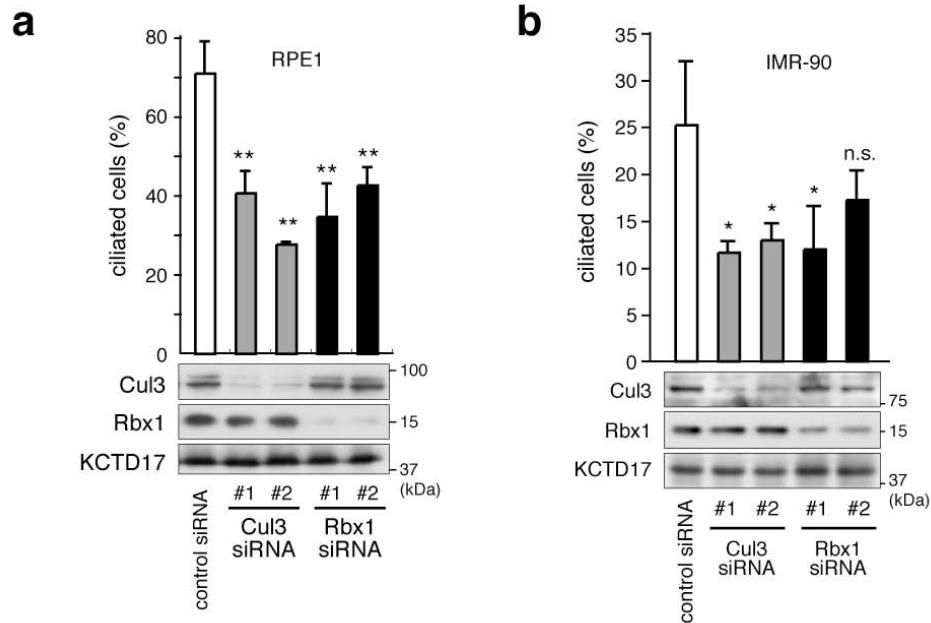

**Supplementary Figure 7 | Depletion of Cul3 or Rbx1 prevents ciliogenesis.** RPE1 (**a**) and IMR-90 (**b**) cells were transfected with control, Cul3 (#1 or #2), or Rbx1 (#1 or #2) siRNAs, and then subjected to 24 h serum starvation. Graphs show percentages of ciliated cells (mean  $\pm$  s.e.m. from three indicated experiments,  $n > 200$  each). Immunoblotting analysis show the protein levels of KCTD17, Cul3 and Rbx1.  $p^{**} < 0.01$ ,  $0.01 < p^* < 0.05$ , n.s., not significant, two-tailed unpaired student's  $t$ -tests.

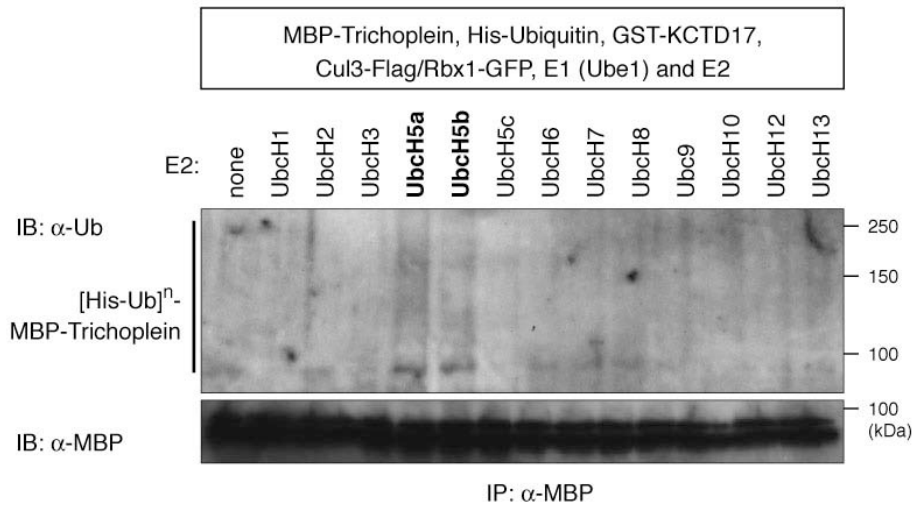

**Supplementary Figure 8 | UbcH5a and UbcH5b function as E2 enzymes that polyubiquitylate trichoplein *in vitro*.** Recombinant MBP-trichoplein was mixed with His-ubiquitin, GST-KCTD17 and E1 (His-Ube1) purified from *E. coli* and Cul3-3xFlag/Rbx1-GFP complex purified from HEK293T cells in reaction mixture. Mixture was subjected to *in vitro* ubiquitylation assays with indicated E2 (His-tagged). Anti-MBP immunoprecipitates were analyzed by immunoblotting with anti-Ubiquitin and anti-MBP.



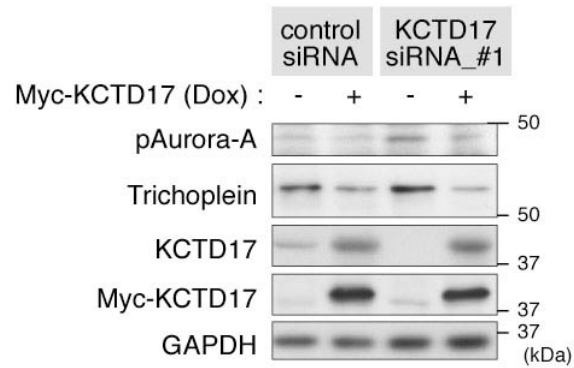

**Supplementary Figure 9 | Myc-KCTD17 expression reverses aberrant trichoplein-Aurora-A activity in KCTD17-depleted cells.** 24 h after transfection with control or KCTD17 (#1) siRNAs, Tet-On RPE1 cells were subjected to 24 h serum starvation. Myc-KCTD17 expression was induced by Dox addition 8 h after siRNA transfection. Levels of pAurora-A, trichoplein, KCTD17 (endogenous KCTD17 plus myc-KCTD17), myc-KCTD17 and GAPDH are shown by immunoblotting analysis.

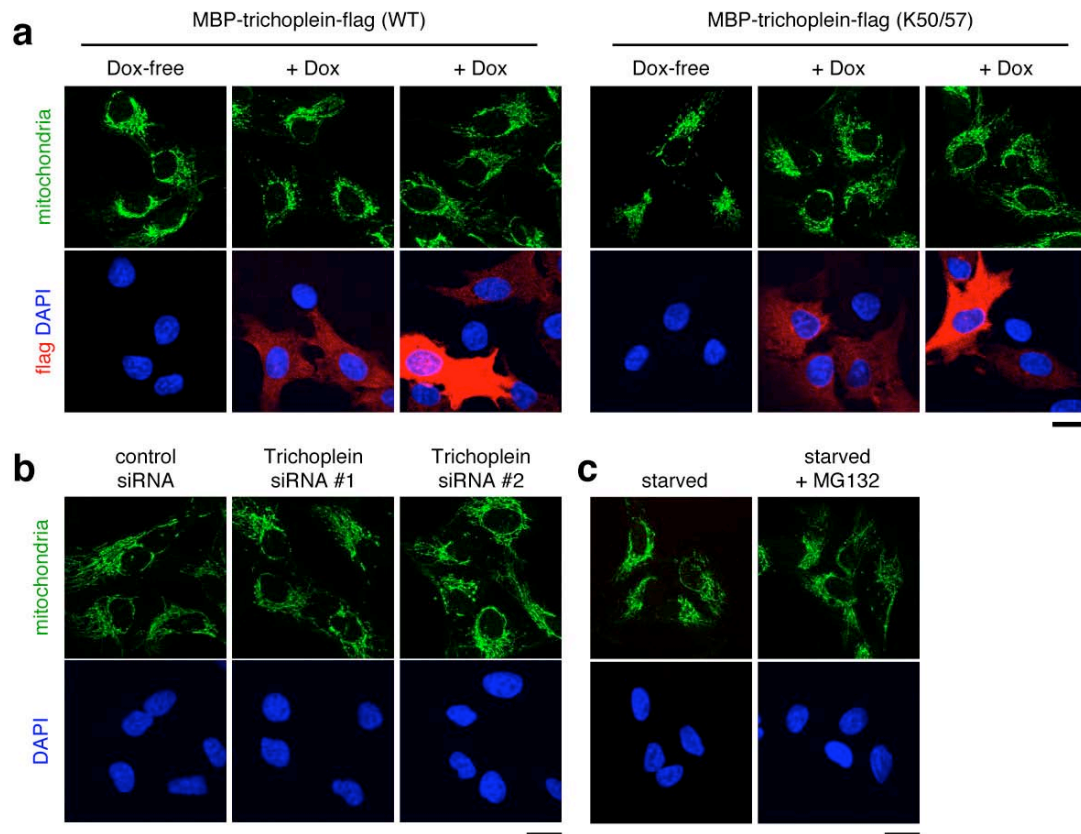

**Supplementary Figure 10 | Effects of trichoplein overexpression, depletion, or stabilization on mitochondria morphology.** (a) MBP-trichoplein-flag WT or K50/57R were overexpressed by Dox treatment in Tet-On RPE1 cells. (b) RPE1 cells were transfected with control or trichoplein (#1 and #2) siRNAs and cultured for 24 h. (c). RPE1 cells were subjected to 24 h serum starvation in the presence of DMSO (starved) or MG132 (starved + MG132). COX IV (a mitochondria maker, green), MBP-trichoplein-flag (red) and DNA (blue) are shown by indirect immunofluorescence. Bars indicate 10  $\mu$ m.

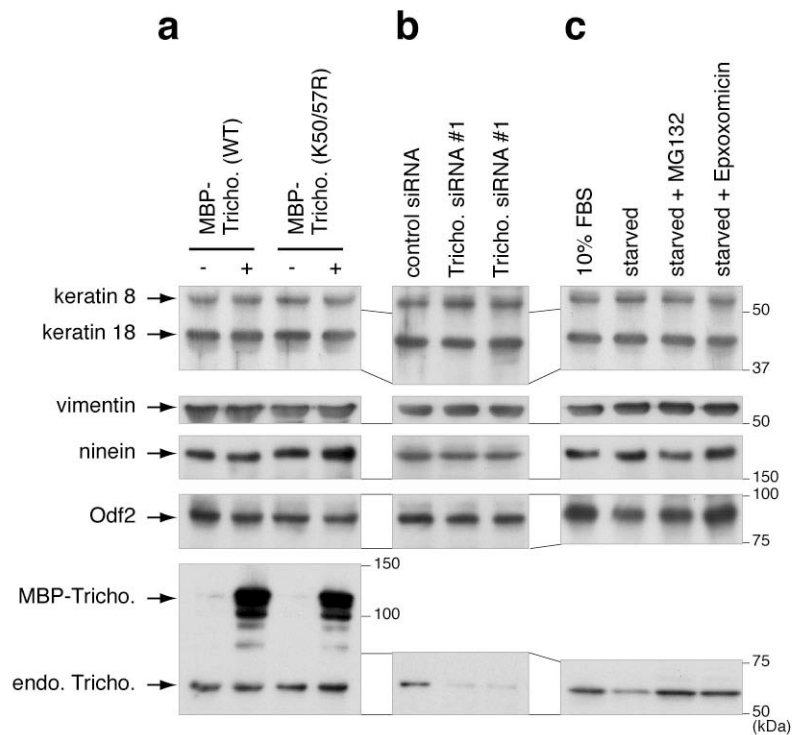

**Supplementary Figure 11 | Effects of trichoplein overexpression, depletion, or stabilization on levels of its binding proteins.** (a) MBP-trichoplein-flag WT or K50/57R were overexpressed by Dox treatment in Tet-On RPE1 cells. (b) RPE1 cells were transfected with control or trichoplein (#1 and #2) siRNAs and cultured for 24 h. (c) RPE1 cells were cultured in normal medium (10% FBS) or subjected to 24 h serum starvation in the presence of DMSO (starved), MG132 or Epoxomicin. Protein levels of keratin-8/18, vimentin, ninein, Odf2 and trichoplein are shown by immunoblotting analysis.

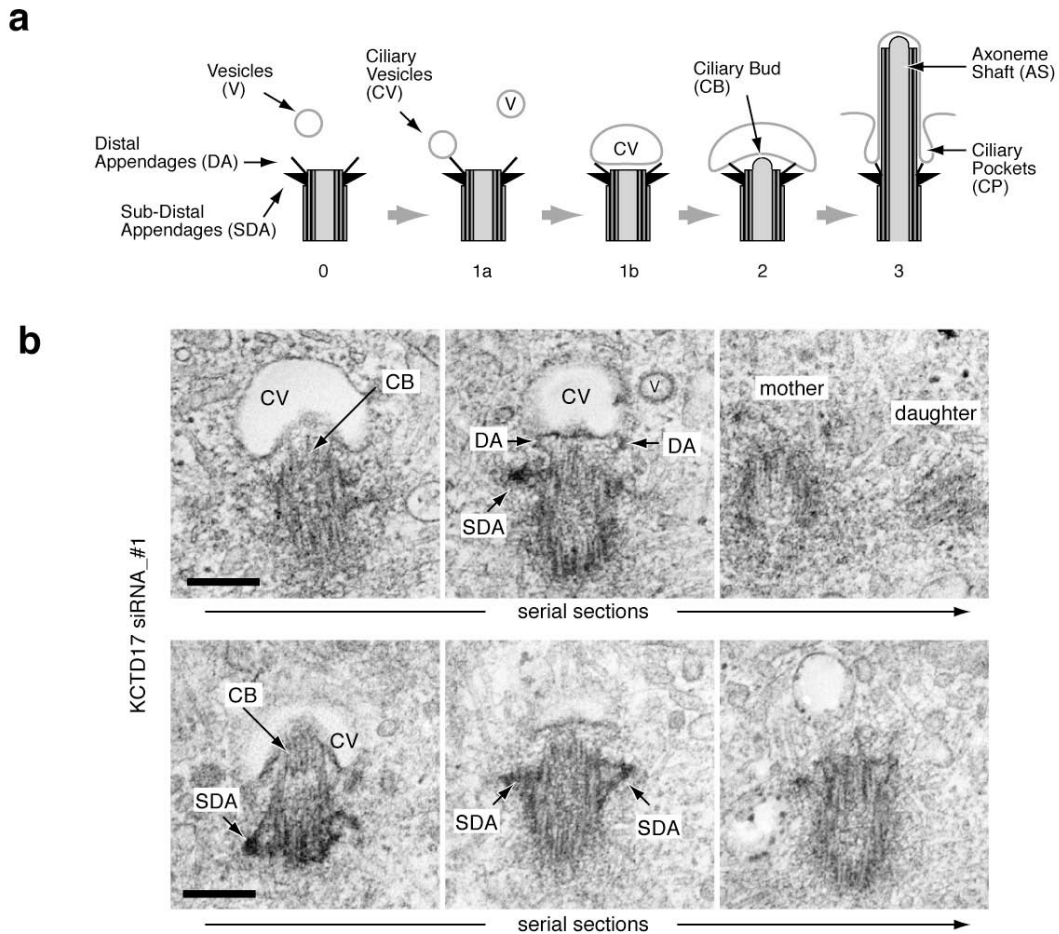

**Supplementary Figure 12 | Ultrastructural analysis of KCTD17-depleted cells.** (a) A schematic model illustrating the different stages of ciliogenesis, according to Sorokin<sup>4,5</sup>. The basal body is characterized by the presence of distal (DA) and subdistal appendages (SDA) (step 0). During early stages, ciliary vesicles (CV) dock at the basal body (step 1a). The CV increases in size by fusion with nearby secondary vesicles (V; step 1b), and become invaginated by the ciliary bud (CB) (step 2). Microtubule doublets start to elongate from the basal body giving rise to the axonemal shaft (AS) and the ciliary pocket (CP; step 3). Last, the elongated CV fuses with plasma membrane, and the cilium emerges in the extracellular environment. (b) TEM analysis of mother centrioles (serial sections) in RPE1 lacking KCTD17 (KCTD17 siRNA #1) subjected to 24 h serum starvation. Bars indicate 500 nm.

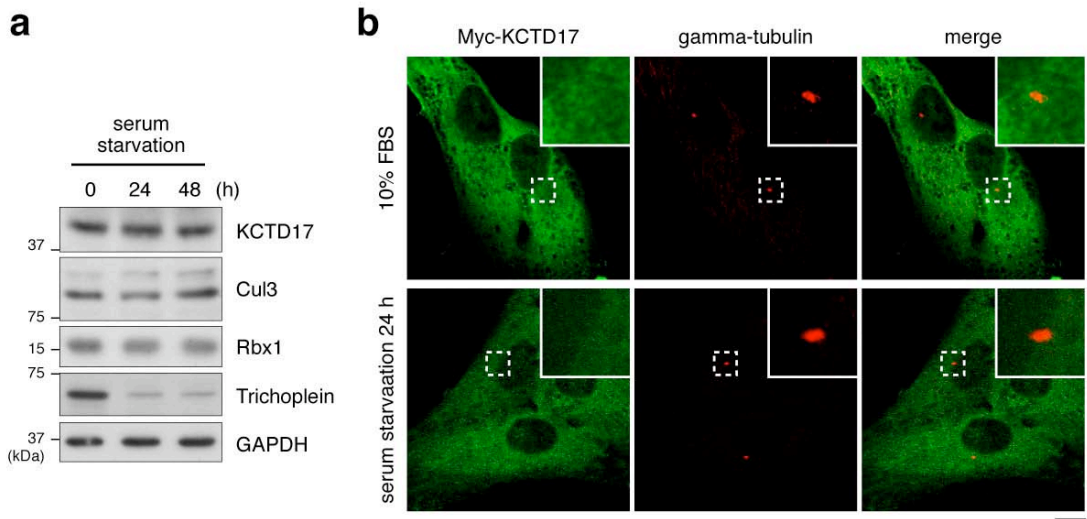

**Supplementary Figure 13 | Protein level and localization of KCTD17 during ciliogenesis.** (a) Immunoblotting analysis shows protein levels of KCTD17, Cul3, Rbx1, trichoplein and GAPDH in RPE1 cells cultured in normal medium (0 h) or subjected to serum starvation (24 or 48 h). (b) Tet-On RPE1 cells expressing myc-KCTD17 were cultured in normal medium (10% FBS) or subjected to serum starvation (24 h). Myc-KCTD17 (green), gamma-tubulin (red) and DNA (blue) are shown by indirect immunofluorescence. Bars indicate 10  $\mu$ m.

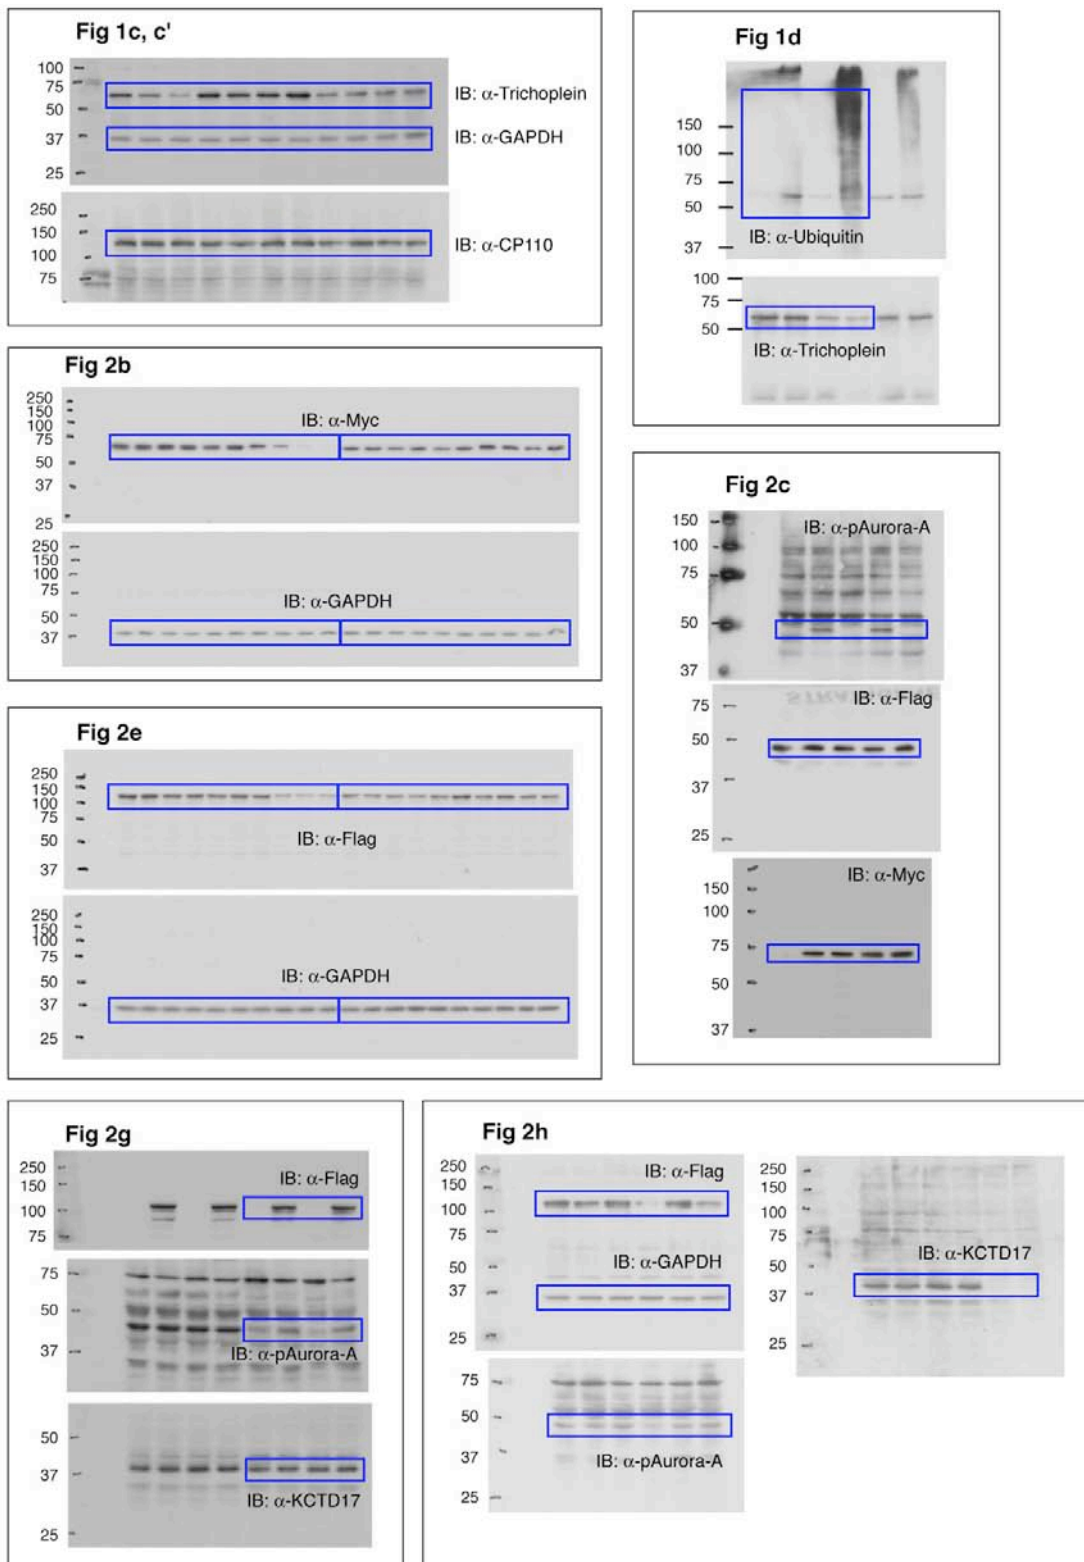

**Supplementary Figure 14 | Uncropped versions of immunoblots referring to Fig. 1c, c' and d; and Fig. 2b, c, e, g and h.**

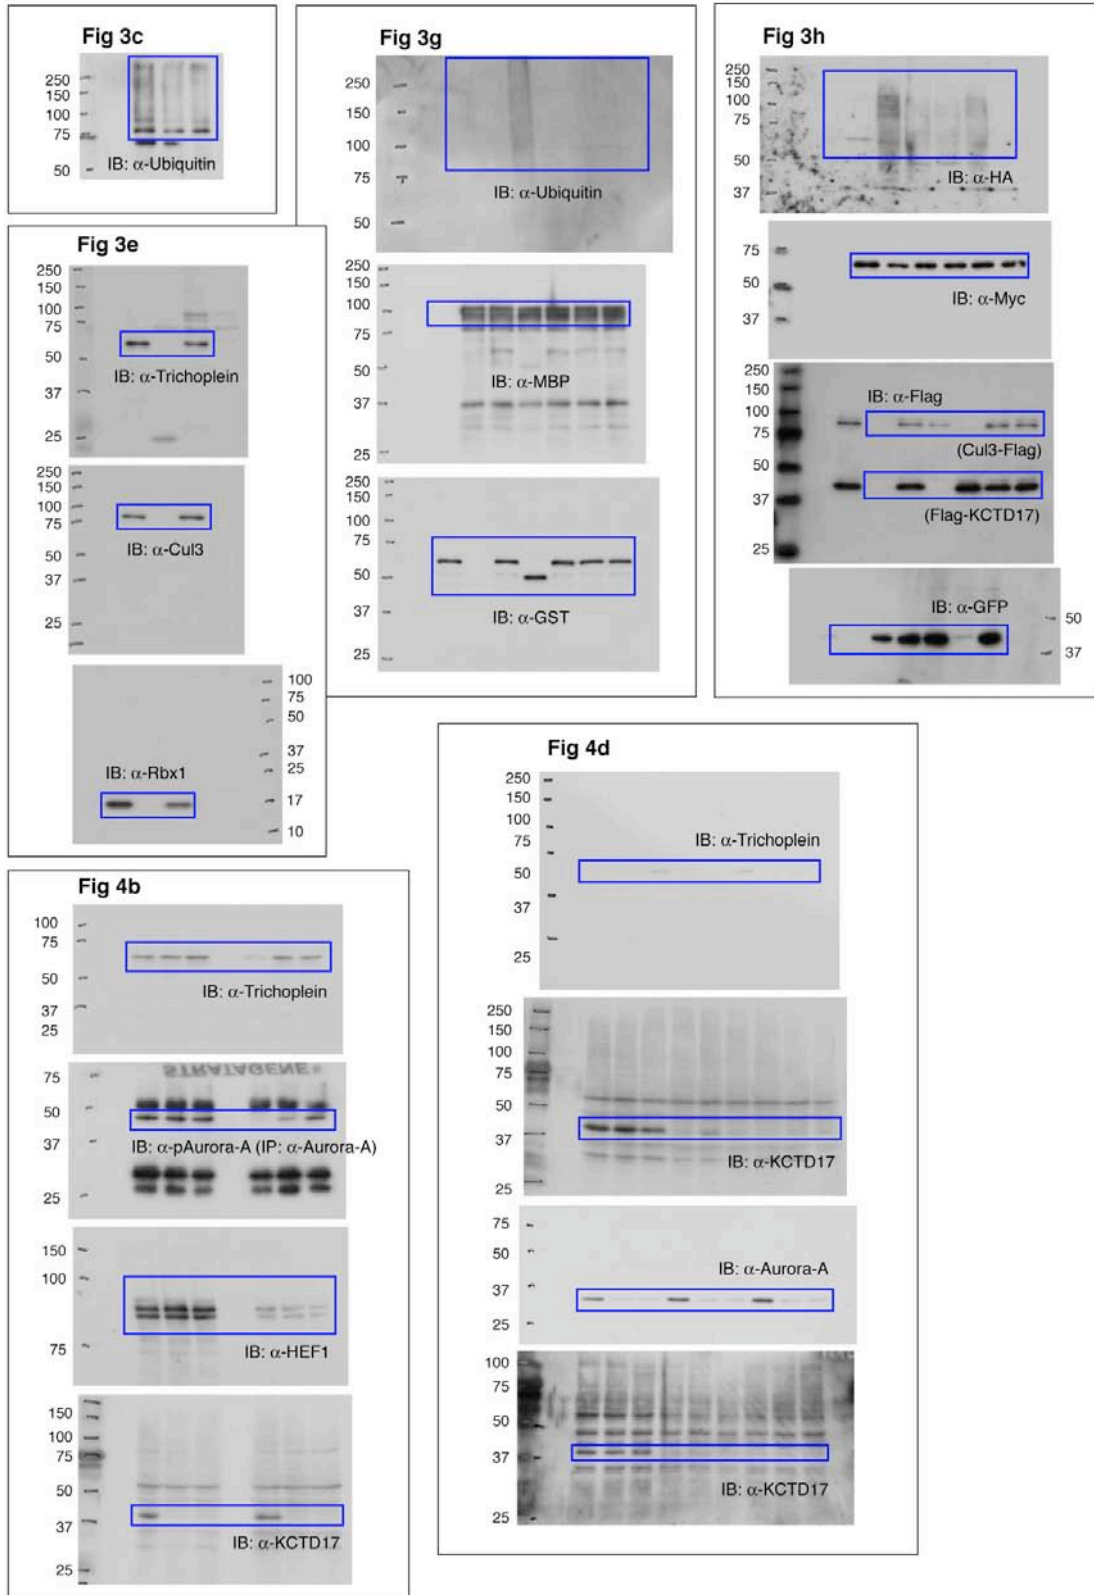

**Supplementary Figure 15 | Uncropped versions of immunoblots referring to Fig. 3c, e, g and h; and Fig. 4b and d.**

Supplementary Table 1. Human E3 ubiquitin ligase gene clones which were selected from HuPEX.

| Gene symbol | HuPEX clones                                                                     | Gene symbol | HuPEX clones                                                        |
|-------------|----------------------------------------------------------------------------------|-------------|---------------------------------------------------------------------|
| ABTB1       | FLJ25872AAAN FLJ27084AAAF FLJ33190AAAN<br>FLJ96119AAAF                           | CNOT4       | FLJ90012AAAN FLJ90190AAAN FLJ95362AAAN                              |
| ABTB2       | FLJ32301AAAN FLJ34241AAAN FLJ38313AAAN                                           | CRBN        | FLJ25462AAAN FLJ52785AAAF FLJ92952AAAF                              |
| AMBRA1      | FLJ13135AAAN                                                                     | CUL1        | FLJ38844AAAN FLJ39186AAAN                                           |
| AMFR        | FLJ13812AAAN                                                                     | CUL2        | FLJ37898AAAN                                                        |
| ANAPC1      | FLJ13745AAAF FLJ33101AAAN FLJ37208AAAN                                           | CUL3        | FLJ76286AAAN                                                        |
| ANAPC10     | FLJ80998AAAF                                                                     | CUL4A       | FLJ95721AAAF                                                        |
| ANAPC11     | FLJ34041AAAN FLJ84203AAAF                                                        | CUL4B       | FLJ41694AAAN FLJ95982AAAF                                           |
| ANAPC13     | FLJ82510AAAF                                                                     | CUL5        | FLJ75330AAAN                                                        |
| ANAPC16     | FLJ33728AAAN                                                                     | CUL7        | FLJ76468AAAN                                                        |
| ANAPC2      | FLJ58169AAAN                                                                     | CUL9        | FLJ26138AAAN FLJ43238AAAN                                           |
| ANAPC4      | FLJ77597AAAN                                                                     | DCAF10      | FLJ90051AAAN                                                        |
| ANAPC5      | FLJ21961AAAN FLJ30217AAAN                                                        | DCAF11      | FLJ23716AAAN FLJ33074AAAN FLJ34538AAAN<br>FLJ37159AAAN              |
| ANAPC7      | FLJ11747AAAN                                                                     | DCAF12      | FLJ20347AAAN                                                        |
| ANKFY1      | FLJ23744AAAN                                                                     | DCAF13      | FLJ10831AAAN FLJ11012AAAF                                           |
| ANKIB1      | FLJ10317AAAN FLJ21822AAAN                                                        | DCAF15      | FLJ35753AAAN                                                        |
| ARIH1       | FLJ93118AAAF                                                                     | DCAF16      | FLJ20280AAAN FLJ31554AAAN                                           |
| ARIH2       | FLJ10938AAAN FLJ33921AAAN FLJ93973AAAF                                           | DCAF17      | FLJ13096AAAN                                                        |
| ARMC5       | FLJ13063AAAN FLJ55719AAAF                                                        | DCAF4       | FLJ14839AAAN FLJ52764AAAF FLJ53137AAAF<br>FLJ96563AAAF              |
| ASB10       | FLJ30974AAAN FLJ43577AAAN                                                        | DCAF5       | FLJ36964AAAF FLJ83531AAAF                                           |
| ASB12       | FLJ39577AAAN                                                                     | DCAF6       | FLJ10122AAAF FLJ36651AAAN                                           |
| ASB13       | FLJ11502AAAN FLJ13134AAAN                                                        | DCAF7       | FLJ54214AAAF                                                        |
| ASB15       | FLJ43370AAAN                                                                     | DCAF8       | FLJ22828AAAN FLJ55296AAAF FLJ55437AAAF                              |
| ASB16       | FLJ30165AAAN                                                                     | DCST1       | FLJ32785AAAN FLJ53894AAAF FLJ53895AAAF<br>FLJ53937AAAF              |
| ASB17       | FLJ25740AAAN                                                                     | DDA1        | FLJ82470AAAF                                                        |
| ASB18       | FLJ41860AAAN                                                                     | DDB2        | FLJ34321AAAN FLJ93771AAAF                                           |
| ASB2        | FLJ11187AAAN FLJ32516AAAN FLJ35952AAAN<br>FLJ96713AAAF                           | DET1        | FLJ10103AAAN FLJ30041AAAN                                           |
| ASB3        | FLJ10123AAAN FLJ10421AAAN FLJ31507AAAN<br>FLJ54769AAAF                           | DIABLO      | FLJ10537AAAN FLJ21115AAAN FLJ25049AAAN<br>FLJ96714AAAF              |
| ASB4        | FLJ82942AAAF                                                                     | DPF1        | FLJ37313AAAN FLJ45263AAAN FLJ55156AAAF                              |
| ASB5        | FLJ25827AAAF FLJ39122AAAN                                                        | DTL         | FLJ10344AAAN FLJ10399AAAN FLJ14745AAAN<br>FLJ20735AAAN FLJ53398AAAF |
| ASB6        | FLJ20548AAAN FLJ54137AAAF                                                        | DTX2        | FLJ13862AAAN FLJ22599AAAF FLJ59034AAAF                              |
| ASB7        | FLJ22551AAAN                                                                     | DTX3        | FLJ34766AAAN FLJ37066AAAF                                           |
| ASB8        | FLJ21255AAAN FLJ43608AAAN FLJ55001AAAF                                           | DTX3L       | FLJ43096AAAF                                                        |
| ASB9        | FLJ20636AAAN                                                                     | DZIP3       | FLJ13076AAAF                                                        |
| ATG16L1     | FLJ10035AAAN FLJ14948AAAN FLJ22677AAAN<br>FLJ23854AAAN FLJ41882AAAN              | ECT2L       | FLJ50042AAAN                                                        |
| BACH1       | FLJ94404AAAF                                                                     | EED         | FLJ56640AAAF                                                        |
| BARD1       | FLJ51596AAAF FLJ95007AAAF                                                        | ENC1        | FLJ39259AAAN                                                        |
| BCL6        | FLJ98110SAAN                                                                     | ERCC8       | FLJ32369AAAN FLJ52883AAAF FLJ56290AAAF<br>FLJ95329AAAF              |
| BCL6B       | FLJ16548AAAN                                                                     | FANCL       | FLJ10335AAAN FLJ51649AAAF                                           |
| BFAR        | FLJ94525AAAF                                                                     | FBXL12      | FLJ20188AAAN FLJ36441AAAN                                           |
| BIRC2       | FLJ93988AAAF                                                                     | FBXL13      | FLJ38068AAAF FLJ40218AAAN                                           |
| BIRC7       | FLJ81925AAAF                                                                     | FBXL14      | FLJ81572AAAF                                                        |
| BIRC8       | FLJ82415WAAF                                                                     | FBXL15      | FLJ82500AAAF                                                        |
| BRAP        | FLJ50182AAAN                                                                     | FBXL16      | FLJ33735AAAF                                                        |
| BRCA1       | FLJ04047AAAN                                                                     | FBXL17      | FLJ44768AAAN                                                        |
| BRWD1       | FLJ11315AAAF                                                                     | FBXL18      | FLJ10776AAAN FLJ11467AAAN FLJ32480AAAN<br>FLJ38075AAAN              |
| BTBD1       | FLJ20724AAAN                                                                     | FBXL19      | FLJ45801AAAN                                                        |
| BTBD10      | FLJ38627AAAF FLJ76439AAAN                                                        | FBXL2       | FLJ10409AAAN FLJ10576AAAN                                           |
| BTBD11      | FLJ16416AAAN FLJ33957AAAN FLJ42845AAAN<br>FLJ45068AAAN FLJ45362AAAF FLJ46588AAAF | FBXL20      | FLJ41053AAAN FLJ92993AAAF                                           |
| BTBD16      | FLJ25359AAAN                                                                     | FBXL21      | FLJ82790AAAF                                                        |
| BTBD2       | FLJ14575AAAN FLJ32256AAAF                                                        | FBXL22      | FLJ82386AAAF                                                        |
| BTBD3       | FLJ50555AAAF                                                                     | FBXL3       | FLJ21831AAAN FLJ95240AAAF                                           |
| BTBD7       | FLJ10648AAAN FLJ11891AAAN FLJ23774AAAF                                           | FBXL4       | FLJ93557AAAF                                                        |
| BTBD8       | FLJ81916AAAF                                                                     | FBXL5       | FLJ20146AAAN FLJ55999AAAF                                           |
| BTBD9       | FLJ32945AAAN FLJ33611AAAF                                                        | FBXL8       | FLJ11278AAAN                                                        |
| BTRC        | FLJ54002AAAF FLJ93878AAAF FLJ93955AAAF                                           | FBXL11      | FLJ12673AAAN FLJ21824AAAN FLJ40415AAAN                              |
| CBL         | FLJ09103AAAN                                                                     | FBXL15      | FLJ36896AAAN                                                        |
| CBLB        | FLJ36865AAAN FLJ41152AAAN                                                        | FBXL17      | FLJ25205AAAN                                                        |
| CBLC        | FLJ81225AAAF                                                                     | FBXL18      | FLJ14475AAAN FLJ14590AAAN FLJ16282AAAF<br>FLJ38024AAAN FLJ96150AAAF |
| CBLL1       | FLJ23109AAAN                                                                     | FBXL21      | FLJ93487AAAF                                                        |
| CCIN        | FLJ94364AAAF                                                                     | FBXL22      | FLJ10837AAAN FLJ90233AAAN                                           |
| CCNB1IP1    | FLJ22580AAAF                                                                     | FBXL25      | FLJ13986AAAN FLJ50132AAAN                                           |
| CCNF        | FLJ93902AAAF                                                                     | FBXL26      | FLJ52290AAAF FLJ60027AAAF FLJ84754AAAF                              |
| CDC16       | FLJ96326AAAF                                                                     | FBXL27      | FLJ81115AAAF                                                        |
| CDC23       | FLJ53431AAAF                                                                     | FBXL28      | FLJ10766AAAN FLJ50331AAAF                                           |
| CDC26       | FLJ85201AAAF                                                                     | FBXL3       | FLJ11081AAAN FLJ46597AAAN                                           |
| CDC27       | FLJ57525AAAN                                                                     | FBXL10      | FLJ41030AAAF FLJ42144AAAN FLJ94182AAAF                              |
| CDCA3       | FLJ34927AAAN FLJ93285AAAF                                                        | FBXL11      | FLJ81555AAAF                                                        |
| CGRFR1      | FLJ96350AAAF                                                                     | FBXL12      | FLJ32424AAAN                                                        |
| CHFR        | FLJ10796AAAN FLJ14781AAAF FLJ30355AAAN<br>FLJ40352AAAN                           | FBXL13      | FLJ50090AAAF                                                        |
| CIAO1       | FLJ51287AAAN FLJ96640AAAF                                                        | FBXL14      |                                                                     |
| CISH        | FLJ94478AAAF                                                                     | FBXL15      |                                                                     |
|             |                                                                                  | FBXL16      |                                                                     |
|             |                                                                                  | FBXL17      |                                                                     |
|             |                                                                                  | FBXL18      |                                                                     |
|             |                                                                                  | FBXL19      |                                                                     |
|             |                                                                                  | FBXL20      |                                                                     |
|             |                                                                                  | FBXL21      |                                                                     |
|             |                                                                                  | FBXL22      |                                                                     |
|             |                                                                                  | FBXL23      |                                                                     |
|             |                                                                                  | FBXL24      |                                                                     |
|             |                                                                                  | FBXL25      |                                                                     |
|             |                                                                                  | FBXL26      |                                                                     |
|             |                                                                                  | FBXL27      |                                                                     |
|             |                                                                                  | FBXL28      |                                                                     |
|             |                                                                                  | FBXL29      |                                                                     |
|             |                                                                                  | FBXL30      |                                                                     |
|             |                                                                                  | FBXL31      |                                                                     |
|             |                                                                                  | FBXL32      |                                                                     |
|             |                                                                                  | FBXL33      |                                                                     |



Supplementary Table 1. (continued)

| Gene symbol | HuPEX clones                                                        | Gene symbol | HuPEX clones                                                                                     |
|-------------|---------------------------------------------------------------------|-------------|--------------------------------------------------------------------------------------------------|
| FBXO34      | FLJ20725AAAA FLJ35554AAAA FLJ35560AAAA                              | KCTD10      | FLJ32350AAAF                                                                                     |
| FBXO36      | FLJ41090AAAA                                                        | KCTD11      | FLJ31665AAAA                                                                                     |
| FBXO38      | FLJ13962AAAA FLJ83590AAAA                                           | KCTD12      | FLJ46506AAAA                                                                                     |
| FBXO39      | FLJ82180AAAF                                                        | KCTD13      | FLJ40088AAAA FLJ75386AAAF                                                                        |
| FBXO4       | FLJ10141AAAA FLJ14013AAAA                                           | KCTD14      | FLJ94527AAAF                                                                                     |
| FBXO40      | FLJ95177AAAF                                                        | KCTD15      | FLJ14995AAAA FLJ39524AAAA                                                                        |
| FBXO41      | FLJ45596AAAA                                                        | KCTD17      | FLJ12242AAAA                                                                                     |
| FBXO42      | FLJ31036AAAF                                                        | KCTD18      | FLJ31322AAAA FLJ37818AAAA                                                                        |
| FBXO44      | FLJ30782AAAA FLJ50458AAAA FLJ50713AAAA                              | KCTD19      | FLJ52078AAAF FLJ52079AAAF                                                                        |
| FBXO45      | FLJ22044AAAA                                                        | KCTD20      | FLJ53295AAAF FLJ53683AAAF                                                                        |
| FBXO5       | FLJ30659AAAA FLJ95258AAAF                                           | KCTD21      | FLJ54885AAAF                                                                                     |
| FBXO6       | FLJ95911AAAF                                                        | KCTD3       | FLJ52085AAAF                                                                                     |
| FBXO7       | FLJ30177AAAA FLJ55022AAAF FLJ76913AAAF                              | KCTD4       | FLJ76027AAAF FLJ81997AAAF                                                                        |
| FBXO8       | FLJ22666AAAF FLJ41746AAAF                                           | KCTD5       | FLJ20040AAAA                                                                                     |
| FBXO9       | FLJ11497AAAA FLJ37988AAAA                                           | KCTD6       | FLJ14666AAAA FLJ90453AAAA                                                                        |
| FBXW11      | FLJ54601AAAF FLJ95926AAAF                                           | KCTD7       | FLJ32069AAAA                                                                                     |
| FBXW12      | FLJ40275AAAF                                                        | KCTD8       | FLJ41353AAAA                                                                                     |
| FBXW2       | FLJ12422AAAA FLJ34541AAAA FLJ53609AAAF<br>FLJ95158AAAF              | KCTD9       | FLJ20038AAAA                                                                                     |
| FBXW4       | FLJ95597AAAF                                                        | KDM2A       | FLJ46431AAAA FLJ51294AAAA                                                                        |
| FBXW5       | FLJ22428AAAA FLJ96847AAAF                                           | KDM2B       | FLJ14534AAAA FLJ14786AAAA FLJ40614AAAA<br>FLJ45399AAAF FLJ55590AAAF FLJ90237AAAA                 |
| FBXW7       | FLJ11071AAAA FLJ55681AAAF                                           | KEAP1       | FLJ31642AAAA                                                                                     |
| FBXW8       | FLJ76330AAAA                                                        | KIAA0317    | FLJ55279AAAF                                                                                     |
| FBXW9       | FLJ41042AAAA FLJ52949AAAF                                           | KLHDC5      | FLJ38086AAAA                                                                                     |
| FEM1B       | FLJ25754AAAA                                                        | KLHL1       | FLJ30047AAAA FLJ52306AAAF                                                                        |
| G2E3        | FLJ12805AAAA FLJ20333AAAA                                           | KLHL10      | FLJ32662AAAA FLJ51379AAAA                                                                        |
| GAN         | FLJ38059AAAF                                                        | KLHL11      | FLJ10572AAAA FLJ51370AAAA                                                                        |
| GMCL1       | FLJ13057AAAA FLJ13199AAAA                                           | KLHL12      | FLJ14350AAAA FLJ14750AAAF                                                                        |
| GMCL1P1     | FLJ96800AAAF                                                        | KLHL13      | FLJ10262AAAF FLJ16227AAAF FLJ43366AAAA<br>FLJ55342AAAF FLJ55461AAAF FLJ55504AAAF                 |
| GNB2        | FLJ32188AAAA FLJ84631AAAF                                           | KLHL15      | FLJ32736AAAA                                                                                     |
| GRWD1       | FLJ29021AAAA FLJ52246AAAF FLJ90195AAAA<br>FLJ96709AAAF              | KLHL17      | FLJ45680AAAF FLJ50001AAAF                                                                        |
| GZF1        | FLJ21794AAAA FLJ31597AAAA FLJ31915AAAF<br>FLJ95435AAAF              | KLHL18      | FLJ13703AAAA                                                                                     |
| HACE1       | FLJ16076AAAA FLJ50472AAAA FLJ50673AAAA                              | KLHL2       | FLJ21636AAAA FLJ96418AAAF                                                                        |
| HECTD1      | FLJ21194AAAF FLJ43800AAAF                                           | KLHL20      | FLJ10568AAAA                                                                                     |
| HECTD2      | FLJ16050AAAF FLJ37306AAAA                                           | KLHL21      | FLJ90824AAAA                                                                                     |
| HECTD3      | FLJ31983AAAA FLJ32311AAAA FLJ34264AAAA<br>FLJ39143AAAA              | KLHL22      | FLJ14360AAAA                                                                                     |
| HECTD4      | FLJ10510AAAA FLJ30092AAAF FLJ34154AAAA                              | KLHL24      | FLJ20059AAAF FLJ22673AAAA FLJ25796AAAA                                                           |
| HECW1       | FLJ12617AAAA FLJ33480AAAA                                           | KLHL25      | FLJ12587AAAA FLJ32101AAAA FLJ34912AAAF<br>FLJ96608AAAF                                           |
| HERC1       | FLJ34305AAAF                                                        | KLHL26      | FLJ11078AAAA                                                                                     |
| HERC2       | FLJ16724AAAA FLJ43239AAAA FLJ59185AAAF                              | KLHL28      | FLJ20081AAAF                                                                                     |
| HERC3       | FLJ50787AAAA                                                        | KLHL29      | FLJ14106AAAA                                                                                     |
| HERC4       | FLJ23155AAAA FLJ83643AAAA                                           | KLHL3       | FLJ40871AAAA FLJ50667AAAA FLJ52387AAAF<br>FLJ95562AAAF                                           |
| HERC5       | FLJ35836AAAA                                                        | KLHL30      | FLJ43374AAAA                                                                                     |
| HERC6       | FLJ20637AAAA FLJ35084AAAA FLJ39849AAAA                              | KLHL32      | FLJ30730AAAA FLJ50156AAAF FLJ52328AAAF                                                           |
| HIC1        | FLJ09113AAAA                                                        | KLHL34      | FLJ34960AAAA                                                                                     |
| HIC2        | FLJ85428AAAA                                                        | KLHL36      | FLJ12543AAAA FLJ16270AAAA                                                                        |
| HLTF        | FLJ82789AAAF                                                        | KLHL4       | FLJ12653AAAA FLJ12995AAAA FLJ31895AAAF                                                           |
| HUWE1       | FLJ20030AAAA FLJ32109AAAA                                           | KLHL5       | FLJ10836AAAA FLJ10974AAAA FLJ11312AAAA                                                           |
| IBTK        | FLJ44825AAAA                                                        | KLHL6       | FLJ39806AAAF FLJ40657AAAA FLJ95278AAAF                                                           |
| IPP         | FLJ13818AAAA                                                        | KLHL7       | FLJ31828AAAF FLJ52310AAAF FLJ52332AAAF<br>FLJ53164AAAF FLJ54026AAAF FLJ54973AAAF<br>FLJ55340AAAF |
| ITCH        | FLJ54369AAAF FLJ96205AAAF                                           | KLHL8       | FLJ46304AAAA                                                                                     |
| IVNS1ABP    | FLJ10411AAAA FLJ10763AAAA FLJ10962AAAA<br>FLJ12958AAAA FLJ13061AAAA | KLHL9       | FLJ13568AAAA FLJ34396AAAA                                                                        |
| KBTBD10     | FLJ93742SAAN                                                        | LGALS3BP    | FLJ25047AAAA FLJ31415AAAF FLJ53427AAAF<br>FLJ53478AAAF FLJ53509AAAF FLJ54583AAAF                 |
| KBTBD12     | FLJ46299AAAA                                                        | LMO7        | FLJ53272AAAF                                                                                     |
| KBTBD2      | FLJ20904AAAA                                                        | LNK1        | FLJ32261AAAA                                                                                     |
| KBTBD3      | FLJ30685AAAF FLJ35674AAAF                                           | LNK2        | FLJ23932AAAA FLJ38000AAAF FLJ93928AAAF                                                           |
| KBTBD4      | FLJ10450AAAF FLJ10887AAAA FLJ34288AAAA                              | LONRF1      | FLJ23749AAAA FLJ54859AAAF                                                                        |
| KBTBD5      | FLJ32015AAAA FLJ51312AAAA                                           | LONRF2      | FLJ45273AAAA                                                                                     |
| KBTBD6      | FLJ32071AAAA FLJ37876AAAA FLJ39289AAAA                              | LONRF3      | FLJ22612AAAA FLJ34458AAAA FLJ40322AAAA                                                           |
| KBTBD7      | FLJ34025AAAA FLJ51290AAAA FLJ96667AAAF                              | LRR1        | FLJ54648AAAF                                                                                     |
| KBTBD8      | FLJ39321WAAAN                                                       | LRRC29      | FLJ38782AAAA FLJ96712AAAF                                                                        |
| KCNA2       | FLJ82784AAAF                                                        | LRSAM1      | FLJ31641AAAA FLJ31743AAAA FLJ34270AAAA<br>FLJ39775AAAA                                           |
| KCNA3       | FLJ94663AAAF                                                        | LTN1        | FLJ13437AAAA                                                                                     |
| KCNC2       | FLJ37401AAAA                                                        | LZTR1       | FLJ45137AAAA FLJ53345AAAF FLJ94057AAAF                                                           |
| KCNC3       | FLJ45584AAAA                                                        | MARCH1      | FLJ20668AAAA FLJ21352AAAA FLJ76212AAAF                                                           |
| KCND1       | FLJ37112AAAF FLJ96049AAAF                                           | MARCH10     | FLJ16660AAAF FLJ35757AAAA                                                                        |
| KCNG1       | FLJ46888AAAF                                                        | MARCH2      | FLJ26653AAAA                                                                                     |
| KCNG3       | FLJ82413AAAF                                                        | MARCH3      | FLJ76009AAAF FLJ82282AAAF                                                                        |
| KCNS2       | FLJ83044AAAF                                                        | MARCH5      | FLJ20445AAAF                                                                                     |
| KCNS3       | FLJ90607AAAA FLJ95252AAAF                                           |             |                                                                                                  |
| KCNV1       | FLJ53836AAAF FLJ94016AAAF                                           |             |                                                                                                  |
| KCNV2       | FLJ59225AAAF                                                        |             |                                                                                                  |
| KCTD1       | FLJ75998AAAF FLJ82370AAAF                                           |             |                                                                                                  |

Supplementary Table 1. (continued)

| Gene symbol | HuPEX clones                                                                                                               | Gene symbol | HuPEX clones                                                                     |
|-------------|----------------------------------------------------------------------------------------------------------------------------|-------------|----------------------------------------------------------------------------------|
| MARCH6      | FLJ10108AAAN FLJ54336AAAF FLJ55749AAAF<br>FLJ95538AAAF                                                                     | RC3H2       | FLJ04013AAAN FLJ20301AAAF FLJ20713AAAN<br>FLJ23389AAAN                           |
| MARCH8      | FLJ83990AAAF FLJ93862AAAF                                                                                                  | RCBTB1      | FLJ10716AAAN FLJ33488AAAN FLJ39335AAAN                                           |
| MARCH9      | FLJ36578AAAF FLJ94564AAAF                                                                                                  | RCBTB2      | FLJ12948AAAF FLJ16324AAAN FLJ54251AAAF<br>FLJ96802AAAF                           |
| MDM2        | FLJ75260WAAN FLJ81856WAAF                                                                                                  | RCHY1       | FLJ34182AAAN                                                                     |
| MDM4        | FLJ51436AAAF FLJ85796AAAN                                                                                                  | RFFL        | FLJ35793AAAN                                                                     |
| MEX3A       | FLJ43493AAAN                                                                                                               | RFPL2       | FLJ31437AAAN                                                                     |
| MEX3B       | FLJ16544AAAN FLJ36826AAAN                                                                                                  | RFPL3       | FLJ40419AAAF                                                                     |
| MEX3C       | FLJ38871AAAN FLJ92328AAAF                                                                                                  | RFPL4B      | FLJ16581AAAN                                                                     |
| MGRN1       | FLJ82812AAAF                                                                                                               | RFWD2       | FLJ10416AAAN FLJ95614AAAF                                                        |
| MIB1        | FLJ33947AAAF FLJ90676AAAF                                                                                                  | RFWD3       | FLJ10520AAAN FLJ12611AAAN FLJ96902AAAF                                           |
| MIB2        | FLJ16279AAAN FLJ16491AAAN FLJ25919AAAN<br>FLJ34291AAAN FLJ38595AAAN FLJ38976AAAF<br>FLJ39787AAAN FLJ46290AAAN FLJ46712AAAN | RHOBTB1     | FLJ90648AAAN                                                                     |
| MID1        | FLJ21534AAAN FLJ96053AAAF                                                                                                  | RHOBTB2     | FLJ76193AAAN                                                                     |
| MID2        | FLJ81560AAAF                                                                                                               | RHOBTB3     | FLJ13559AAAN                                                                     |
| MKRN1       | FLJ21334AAAN FLJ23484AAAF FLJ45086AAAF<br>FLJ96622AAAF                                                                     | RING1       | FLJ51343AAAN FLJ76639AAAN                                                        |
| MKRN2       | FLJ33999AAAN FLJ52346AAAF                                                                                                  | RLIM        | FLJ10472AAAN FLJ95628AAAF                                                        |
| MKRN3       | FLJ82266AAAF                                                                                                               | RNF10       | FLJ36692AAAN FLJ40488AAAN FLJ44288AAAF<br>FLJ96629AAAF                           |
| MLL3        | FLJ12625AAAN                                                                                                               | RNF103      | FLJ16725AAAN FLJ94902AAAF                                                        |
| MSL2        | FLJ10546AAAN FLJ54913AAAF                                                                                                  | RNF11       | FLJ93630AAAF                                                                     |
| MUL1        | FLJ12875AAAN FLJ52155AAAF FLJ55316AAAF                                                                                     | RNF111      | FLJ16278AAAF FLJ16671AAAN FLJ38008AAAN                                           |
| MYCBP2      | FLJ21597AAAF FLJ21646AAAN                                                                                                  | RNF112      | FLJ52256AAAF                                                                     |
| MYLIP       | FLJ23811AAAN FLJ95492AAAF                                                                                                  | RNF113A     | FLJ95648AAAF                                                                     |
| MYNN        | FLJ11584AAAN FLJ52196AAAF                                                                                                  | RNF113B     | FLJ81147AAAF                                                                     |
| NEDD4       | FLJ54469AAAF                                                                                                               | RNF114      | FLJ34657AAAN FLJ54192AAAF FLJ96725AAAF                                           |
| NEDD4L      | FLJ04160AAAN                                                                                                               | RNF115      | FLJ75672AAAF FLJ82335AAAF                                                        |
| NEURL       | FLJ81570AAAF                                                                                                               | RNF121      | FLJ11099AAAN FLJ13077AAAN FLJ37189AAAN                                           |
| NEURL2      | FLJ30259AAAN                                                                                                               | RNF122      | FLJ12526AAAN                                                                     |
| NEURL3      | FLJ54814AAAF                                                                                                               | RNF123      | FLJ12565AAAN FLJ23315AAAF FLJ33313AAAN<br>FLJ39034AAAN FLJ44935AAAN              |
| NFXL1       | FLJ16294AAAF                                                                                                               | RNF126      | FLJ20552AAAN                                                                     |
| NLE1        | FLJ10458AAAN                                                                                                               | RNF128      | FLJ23684AAAN FLJ44589AAAF                                                        |
| NOSIP       | FLJ35125AAAN FLJ54756AAAF FLJ75703AAAF<br>FLJ84625AAAF                                                                     | RNF13       | FLJ33319AAAN FLJ33452AAAF                                                        |
| NSMCE1      | FLJ32233AAAN FLJ96768AAAF                                                                                                  | RNF130      | FLJ84413AAAF FLJ93572AAAF                                                        |
| NUP43       | FLJ23731AAAF FLJ38675AAAN FLJ53749AAAF<br>FLJ54281AAAF                                                                     | RNF133      | FLJ25658AAAF                                                                     |
| OSTM1       | FLJ26344AAAN FLJ90531AAAN                                                                                                  | RNF135      | FLJ16075AAAN FLJ16196AAAN                                                        |
| PAFAH1B1    | FLJ51164AAAF FLJ52123AAAF FLJ93559AAAN                                                                                     | RNF138      | FLJ13517AAAN FLJ96873AAAF                                                        |
| PARK2       | FLJ82639AAAF                                                                                                               | RNF139      | FLJ10740AAAN FLJ21390AAAN FLJ25653AAAN                                           |
| PATZ1       | FLJ83525AAAN                                                                                                               | RNF14       | FLJ13636AAAF FLJ13822AAAN FLJ25139AAAN                                           |
| PCGF1       | FLJ43754AAAN                                                                                                               | RNF141      | FLJ75906AAAF                                                                     |
| PCGF2       | FLJ81738AAAN                                                                                                               | RNF144A     | FLJ80777AAAF                                                                     |
| PCGF3       | FLJ32562AAAN FLJ43813AAAN FLJ54810AAAF<br>FLJ83855WAAF                                                                     | RNF144B     | FLJ39513AAAN                                                                     |
| PCGF5       | FLJ51751AAAF                                                                                                               | RNF145      | FLJ25936AAAN FLJ44310AAAN FLJ55465AAAF<br>FLJ55623AAAF FLJ60012AAAF FLJ90620AAAN |
| PCGF6       | FLJ14979AAAN FLJ84231AAAF                                                                                                  | RNF146      | FLJ14530AAAN FLJ14652AAAN FLJ14870AAAF                                           |
| PDZRN3      | FLJ54738AAAF FLJ54746AAAF FLJ90092AAAN                                                                                     | RNF148      | FLJ25387AAAN FLJ25788AAAN                                                        |
| PDZRN4      | FLJ16796AAAN FLJ37371AAAN FLJ52105AAAF                                                                                     | RNF149      | FLJ26288AAAN FLJ90504AAAN FLJ90660AAAN                                           |
| PEX10       | FLJ42826AAAN FLJ84836AAAF                                                                                                  | RNF150      | FLJ27010AAAN                                                                     |
| PEX12       | FLJ93019AAAF                                                                                                               | RNF151      | FLJ82945AAAF                                                                     |
| PEX2        | FLJ93460AAAN                                                                                                               | RNF152      | FLJ16292AAAN FLJ39176AAAN                                                        |
| PHF7        | FLJ82033AAAF                                                                                                               | RNF157      | FLJ31387AAAN FLJ34148AAAN                                                        |
| PHIP        | FLJ20705AAAF FLJ90643AAAN                                                                                                  | RNF165      | FLJ16418AAAN FLJ45559AAAN                                                        |
| PJA1        | FLJ11830AAAF FLJ39292AAAN                                                                                                  | RNF166      | FLJ32544AAAN FLJ32639AAAN FLJ84091AAAF                                           |
| PJA2        | FLJ80392AAAN                                                                                                               | RNF167      | FLJ21676AAAN                                                                     |
| PML         | FLJ04040AAAN FLJ04040SAAN FLJ23218AAAN<br>FLJ40881AAAF                                                                     | RNF168      | FLJ35794AAAN                                                                     |
| POC1B       | FLJ14923AAAN FLJ41111AAAN FLJ58572AAAF<br>FLJ90291AAAN                                                                     | RNF17       | FLJ11045AAAN                                                                     |
| PPIL2       | FLJ45326AAAN FLJ84832AAAN                                                                                                  | RNF170      | FLJ14842AAAN FLJ33545AAAN                                                        |
| PRPF19      | FLJ81036AAAF                                                                                                               | RNF175      | FLJ34190AAAN FLJ84045AAAF                                                        |
| PWP1        | FLJ51512AAAF FLJ51513AAAF                                                                                                  | RNF180      | FLJ33437AAAF                                                                     |
| RAB40A      | FLJ32297AAAN                                                                                                               | RNF181      | FLJ80975AAAF                                                                     |
| RAB40B      | FLJ81994AAAF                                                                                                               | RNF182      | FLJ33257AAAN FLJ96594AAAF                                                        |
| RABGEF1     | FLJ10840AAAN FLJ32302AAAN FLJ34077AAAF<br>FLJ45891AAAN FLJ55772AAAF                                                        | RNF183      | FLJ34621AAAN                                                                     |
| RAD18       | FLJ13013AAAN                                                                                                               | RNF185      | FLJ53598AAAF FLJ84293AAAF                                                        |
| RAG1        | FLJ82750AAAF                                                                                                               | RNF186      | FLJ20225AAAN                                                                     |
| RBBP4       | FLJ50184AAAF FLJ92946AAAF                                                                                                  | RNF19A      | FLJ10912AAAN FLJ13393AAAN FLJ23417AAAN<br>FLJ33137AAAF                           |
| RBBP5       | FLJ83102AAAF                                                                                                               | RNF19B      | FLJ16569AAAN FLJ90005AAAF                                                        |
| RBBP6       | FLJ04037AAAN FLJ23301AAAN                                                                                                  | RNF2        | FLJ34255AAAN FLJ95665AAAN                                                        |
| RBBP7       | FLJ34592AAAN                                                                                                               | RNF20       | FLJ11189AAAN FLJ12238AAAN FLJ12470AAAN<br>FLJ95178AAAF                           |
| RBCK1       | FLJ81936AAAF                                                                                                               | RNF207      | FLJ32096AAAN FLJ45800AAAN FLJ46380AAAN<br>FLJ54599AAAF                           |
| RBX1        | FLJ96824AAAF                                                                                                               | RNF208      | FLJ81973AAAF                                                                     |
| RC3H1       | FLJ04046AAAN FLJ16661AAAF FLJ36182AAAN                                                                                     | RNF212      | FLJ38841AAAN FLJ38841SAAN                                                        |

Supplementary Table 1. (continued)

| Gene symbol | HuPEX clones                                                                                                  | Gene symbol | HuPEX clones                                                                                                               |
|-------------|---------------------------------------------------------------------------------------------------------------|-------------|----------------------------------------------------------------------------------------------------------------------------|
| RNF213      | FLJ13051AAAN FLJ13809AAAN FLJ22023AAAF<br>FLJ22023WAAN FLJ22261AAAN FLJ22385AAAN<br>FLJ45432AAAF FLJ46021AAAN | TRAIP       | FLJ08192AAAN                                                                                                               |
| RNF214      | FLJ54868AAAF                                                                                                  | TRIM11      | FLJ40506AAAN FLJ56023AAAF FLJ90142AAAF<br>FLJ90385AAAN FLJ95361AAAF                                                        |
| RNF215      | FLJ59014AAAF                                                                                                  | TRIM13      | FLJ10944AAAN FLJ95311AAAF                                                                                                  |
| RNF216      | FLJ10054AAAF FLJ21134AAAN FLJ41641AAAN<br>FLJ95092AAAF                                                        | TRIM15      | FLJ82219AAAN                                                                                                               |
| RNF217      | FLJ16403AAAN                                                                                                  | TRIM17      | FLJ30864AAAN                                                                                                               |
| RNF219      | FLJ13449AAAN FLJ25774AAAN                                                                                     | TRIM2       | FLJ82555AAAF                                                                                                               |
| RNF220      | FLJ10597AAAN FLJ31862AAAN FLJ42800AAAF<br>FLJ52472AAAF FLJ54701AAAF FLJ54815AAAF<br>FLJ81616AAAF              | TRIM21      | FLJ81065AAAF                                                                                                               |
| RNF24       | FLJ13906AAAN FLJ75387AAAF                                                                                     | TRIM22      | FLJ51040AAAN FLJ51049AAAN FLJ51115AAAN<br>FLJ76655AAAN                                                                     |
| RNF25       | FLJ16070AAAN FLJ91063AAAN                                                                                     | TRIM24      | FLJ45687AAAF FLJ90825AAAF                                                                                                  |
| RNF26       | FLJ10111AAAN FLJ16199AAAF                                                                                     | TRIM26      | FLJ16483AAAN                                                                                                               |
| RNF31       | FLJ21786AAAF FLJ39675AAAN FLJ52837AAAF                                                                        | TRIM27      | FLJ81103AAAF                                                                                                               |
| RNF34       | FLJ21343AAAN FLJ36161AAAN FLJ40334AAAN                                                                        | TRIM28      | FLJ29029AAAN FLJ80047AAAN FLJ94025AAAF                                                                                     |
| RNF38       | FLJ46157AAAF                                                                                                  | TRIM3       | FLJ16135AAAN FLJ44731AAAF FLJ55875AAAF                                                                                     |
| RNF4        | FLJ14500AAAN FLJ16291AAAN FLJ91219AAAN                                                                        | TRIM31      | FLJ81974AAAF                                                                                                               |
| RNF40       | FLJ50872AAAF FLJ51733AAAF FLJ95687AAAF                                                                        | TRIM32      | FLJ85452AAAF                                                                                                               |
| RNF41       | FLJ20315AAAN FLJ50102AAAN FLJ51697AAAF                                                                        | TRIM33      | FLJ13372AAAN FLJ32925AAAN FLJ55940AAAF                                                                                     |
| RNF43       | FLJ45771AAAN                                                                                                  | TRIM34      | FLJ14970AAAN                                                                                                               |
| RNF44       | FLJ51221AAAF FLJ92125AAAF                                                                                     | TRIM36      | FLJ25450AAAF                                                                                                               |
| RNF5        | FLJ53858AAAF FLJ92781AAAN                                                                                     | TRIM37      | FLJ21995AAAF                                                                                                               |
| RNF6        | FLJ92255AAAF                                                                                                  | TRIM38      | FLJ93754AAAF                                                                                                               |
| RNF7        | FLJ12013AAAN FLJ50824AAAN                                                                                     | TRIM4       | FLJ35573AAAN                                                                                                               |
| RNF8        | FLJ25783AAAN                                                                                                  | TRIM40      | FLJ82349AAAF                                                                                                               |
| RNFT1       | FLJ14627AAAN FLJ35845AAAN                                                                                     | TRIM41      | FLJ14695AAAN                                                                                                               |
| RNFT2       | FLJ14643AAAN FLJ24006AAAF FLJ42610AAAN                                                                        | TRIM42      | FLJ40097AAAN                                                                                                               |
| RSPRY1      | FLJ94773AAAF                                                                                                  | TRIM43      | FLJ81122AAAF                                                                                                               |
| SCAF11      | FLJ10435AAAN FLJ90452AAAF                                                                                     | TRIM45      | FLJ13181AAAN                                                                                                               |
| SF3B3       | FLJ21602AAAN                                                                                                  | TRIM46      | FLJ23229AAAN FLJ38839AAAF FLJ46260AAAN                                                                                     |
| SH3RF1      | FLJ23654AAAF FLJ25317AAAN                                                                                     | TRIM47      | FLJ82606AAAF                                                                                                               |
| SH3RF2      | FLJ41701AAAN FLJ53408AAAF FLJ55912AAAF                                                                        | TRIM48      | FLJ80963AAAF                                                                                                               |
| SHKBP1      | FLJ90576AAAN FLJ93157AAAF                                                                                     | TRIM5       | FLJ14687AAAN FLJ23783AAAN                                                                                                  |
| SHPRH       | FLJ27258AAAN FLJ45012AAAN                                                                                     | TRIM50      | FLJ32804AAAN                                                                                                               |
| SIAH1       | FLJ08065AAAN FLJ37344AAAN FLJ94493AAAF                                                                        | TRIM51      | FLJ80994AAAF                                                                                                               |
| SIAH2       | FLJ30728AAAN FLJ83477AAAF                                                                                     | TRIM52      | FLJ30240AAAN                                                                                                               |
| SKP1        | FLJ08087AAAN                                                                                                  | TRIM55      | FLJ33991AAAN FLJ34409AAAN                                                                                                  |
| SKP2        | FLJ53740AAAF                                                                                                  | TRIM56      | FLJ35608AAAF FLJ83690AAAN FLJ90774AAAF                                                                                     |
| SLX4        | FLJ16318AAAN FLJ38092AAAN                                                                                     | TRIM58      | FLJ38869AAAN                                                                                                               |
| SMU1        | FLJ10805AAAN FLJ54259AAAF                                                                                     | TRIM6       | FLJ14758AAAN FLJ51024AAAN                                                                                                  |
| SMURF2      | FLJ82924AAAF FLJ85600SAAN                                                                                     | TRIM60      | FLJ35882AAAN                                                                                                               |
| SNRNP40     | FLJ41108AAAN FLJ56825AAAF FLJ90035AAAN<br>FLJ94417AAAF                                                        | TRIM62      | FLJ10759AAAN FLJ16558AAAN FLJ51302AAAN                                                                                     |
| SOCS1       | FLJ45719AAAN                                                                                                  | TRIM63      | FLJ32380AAAN FLJ50813AAAN FLJ83113WAAF                                                                                     |
| SOCS2       | FLJ08186AAAN FLJ52461AAAF FLJ93661AAAF                                                                        | TRIM67      | FLJ44831AAAN                                                                                                               |
| SOCS3       | FLJ94944AAAF                                                                                                  | TRIM68      | FLJ10369AAAN FLJ12861AAAN FLJ31961AAAN<br>FLJ54177AAAF                                                                     |
| SOCS4       | FLJ42089AAAN FLJ45366AAAN                                                                                     | TRIM69      | FLJ82288AAAF                                                                                                               |
| SOCS5       | FLJ51885AAAF                                                                                                  | TRIM7       | FLJ95773AAAF                                                                                                               |
| SOCS7       | FLJ07010AAAN                                                                                                  | TRIM72      | FLJ16664AAAN FLJ33376AAAN                                                                                                  |
| SPOP        | FLJ51096AAAN FLJ51172AAAF FLJ53827AAAF<br>FLJ93086AAAF                                                        | TRIM73      | FLJ84145AAAF                                                                                                               |
| SPOPL       | FLJ11857AAAF FLJ53775AAAF FLJ85173AAAF                                                                        | TRIM8       | FLJ81566AAAF                                                                                                               |
| SPSB1       | FLJ22393AAAN FLJ26545AAAN                                                                                     | TRIM9       | FLJ30826AAAN                                                                                                               |
| SPSB2       | FLJ55414AAAF                                                                                                  | TRIML1      | FLJ36180AAAN                                                                                                               |
| SPSB3       | FLJ25121AAAN FLJ51375AAAN                                                                                     | TRIP12      | FLJ52804AAAF                                                                                                               |
| SPSB4       | FLJ31805AAAF                                                                                                  | TRPC4AP     | FLJ50256AAAN FLJ50335AAAN FLJ51744AAAF<br>FLJ96658AAAF                                                                     |
| STUB1       | FLJ81025AAAN                                                                                                  | TSPAN17     | FLJ82872AAAF                                                                                                               |
| SYVN1       | FLJ44964AAAN                                                                                                  | TTC3        | FLJ53531AAAF FLJ82969AAAF                                                                                                  |
| TBL1X       | FLJ82316AAAF                                                                                                  | UBE3A       | FLJ26981AAAN FLJ77551AAAN FLJ77614AAAN<br>FLJ80585SAAN                                                                     |
| TBL1XR1     | FLJ22093AAAN FLJ55712AAAF                                                                                     | UBE3B       | FLJ45294AAAN FLJ51547AAAF FLJ51548AAAF                                                                                     |
| TCEB1       | FLJ25160AAAN                                                                                                  | UBE3C       | FLJ45347AAAF                                                                                                               |
| TCEB2       | FLJ83036AAAF                                                                                                  | UBE4A       | FLJ51394AAAN                                                                                                               |
| TCEB3       | FLJ93561AAAF                                                                                                  | UBE4B       | FLJ78424AAAN                                                                                                               |
| TLE1        | FLJ50374AAAF FLJ59241AAAF                                                                                     | UBOX5       | FLJ12382AAAN                                                                                                               |
| TLE2        | FLJ41188AAAN FLJ85685AAAN                                                                                     | UBR1        | FLJ45570AAAN                                                                                                               |
| TLE3        | FLJ10396AAAF FLJ39460AAAN                                                                                     | UBR2        | FLJ23295AAAN FLJ23345AAAN FLJ33555AAAN<br>FLJ43807AAAN FLJ45378AAAN                                                        |
| TNFAIP3     | FLJ50737AAAN FLJ92717AAAF                                                                                     | UBR3        | FLJ45053AAAN FLJ45646AAAN FLJ53501AAAF                                                                                     |
| TNFAIP3     | FLJ93305AAAF                                                                                                  | UBR4        | FLJ10371AAAF FLJ12260AAAN FLJ12511AAAN<br>FLJ12862AAAN FLJ13764AAAF FLJ31656AAAN<br>FLJ41863AAAN FLJ53474AAAF FLJ53484AAAF |
| TOR1AIP2    | FLJ83828WAAF                                                                                                  | UBR5        | FLJ11310AAAN                                                                                                               |
| TRAF2       | FLJ30124AAAN FLJ53315AAAF FLJ54037AAAF<br>FLJ75198AAAN                                                        | UHRF1       | FLJ21925AAAN FLJ95411AAAF                                                                                                  |
| TRAF4       | FLJ81684AAAN                                                                                                  | UHRF2       | FLJ16243AAAN                                                                                                               |
| TRAF5       | FLJ44538AAAF FLJ55439AAAF                                                                                     | UNKL        | FLJ12623AAAN FLJ23360AAAN                                                                                                  |
| TRAF6       | FLJ75865AAAN FLJ82127AAAF                                                                                     | VHL         | FLJ51515AAAF FLJ96920AAAF                                                                                                  |
| TRAF7       | FLJ33305AAAF                                                                                                  | VPRBP       | FLJ13177AAAN                                                                                                               |

Supplementary Table 1. (continued)

| Gene symbol | HuPEX clones                                                        | Gene symbol | HuPEX clones                           |
|-------------|---------------------------------------------------------------------|-------------|----------------------------------------|
| VPS11       | FLJ13217AAAF FLJ22359AAAF FLJ32139AAAN                              | ZBTB33      | FLJ92632AAAF                           |
| VPS18       | FLJ82481AAAF                                                        | ZBTB37      | FLJ32748AAAN FLJ84795AAAF              |
| VPS41       | FLJ23195AAAN FLJ23745AAAN FLJ95380AAAF                              | ZBTB38      | FLJ22332AAAN FLJ36882AAAN              |
| VPS8        | FLJ12883AAAN                                                        | ZBTB39      | FLJ76063AAAN                           |
| WDR12       | FLJ10881AAAN FLJ12719AAAN FLJ51286AAAN                              | ZBTB4       | FLJ16429AAAF FLJ16715AAAN FLJ23490AAAN |
| WDR26       | FLJ04162AAAN FLJ21016AAAF                                           | ZBTB40      | FLJ37954AAAN FLJ95610AAAF              |
| WDR5        | FLJ20545AAAN                                                        | ZBTB41      | FLJ36199AAAN FLJ46708AAAN              |
| WDR53       | FLJ81816WAAF FLJ94793AAAF                                           | ZBTB43      | FLJ22470AAAN                           |
| WDR59       | FLJ12270AAAF FLJ33997AAAF FLJ54513AAAF                              | ZBTB44      | FLJ21006AAAN FLJ83953AAAN FLJ95555AAAF |
| WDR5B       | FLJ11287AAAN FLJ96167AAAF                                           | ZBTB45      | FLJ14486AAAN FLJ26546AAAN              |
| WDR61       | FLJ21101AAAN                                                        | ZBTB46      | FLJ16656AAAN                           |
| WDR76       | FLJ12973AAAN                                                        | ZBTB47      | FLJ45122AAAN                           |
| WDR82       | FLJ23710AAAN FLJ25569AAAN FLJ41866AAAF                              | ZBTB48      | FLJ93203AAAF                           |
| WDSUB1      | FLJ26473AAAN FLJ36175AAAN                                           | ZBTB49      | FLJ38559AAAN FLJ45653AAAF              |
| WDT01       | FLJ10872AAAN FLJ13039AAAN FLJ13716AAAN                              | ZBTB5       | FLJ82547AAAN                           |
| WHSC1       | FLJ23286AAAN FLJ77008AAAN FLJ84428SAAN<br>FLJ85606SAAN              | ZBTB6       | FLJ77379AAAN                           |
| WSB1        | FLJ90436AAAN                                                        | ZBTB7A      | FLJ82903AAAN FLJ85799WAAAN             |
| WSB2        | FLJ59692AAAF FLJ83086AAAF                                           | ZBTB7B      | FLJ55472AAAF                           |
| WWP1        | FLJ82196AAAN                                                        | ZBTB8A      | FLJ90065AAAN                           |
| WWP2        | FLJ44359AAAN FLJ55648AAAF FLJ93210AAAF                              | ZBTB8B      | FLJ35007AAAN                           |
| XIAP        | FLJ94517AAAF                                                        | ZBTB9       | FLJ16072AAAN FLJ94135AAAF              |
| ZBTB1       | FLJ82307AAAF                                                        | ZC3HC1      | FLJ10455AAAN FLJ12311AAAN              |
| ZBTB10      | FLJ12752AAAN FLJ32351AAAN                                           | ZFAND3      | FLJ13222AAAN                           |
| ZBTB11      | FLJ13426AAAN FLJ93302AAAF                                           | ZFAND4      | FLJ33385AAAN FLJ40185AAAF FLJ95171AAAF |
| ZBTB12      | FLJ81360AAAF                                                        | ZFAND5      | FLJ22129AAAN                           |
| ZBTB16      | FLJ82076AAAF                                                        | ZFAND6      | FLJ93032AAAF                           |
| ZBTB17      | FLJ50396AAAN FLJ50647AAAF FLJ50726AAAN<br>FLJ54401AAAF FLJ96187AAAF | ZFP161      | FLJ93740AAAF                           |
| ZBTB2       | FLJ35567AAAN FLJ84026AAAN                                           | ZFPL1       | FLJ52460AAAF FLJ76912AAAN              |
| ZBTB20      | FLJ26458AAAN FLJ96336AAAF                                           | ZNF131      | FLJ32781AAAF FLJ55375AAAF              |
| ZBTB22      | FLJ38659AAAN FLJ96856AAAF                                           | ZNF238      | FLJ84916AAAN                           |
| ZBTB25      | FLJ40862AAAN                                                        | ZNF295      | FLJ82852AAAF                           |
| ZBTB26      | FLJ25354AAAN FLJ32883AAAN                                           | ZNF645      | FLJ25735AAAF                           |
| ZBTB3       | FLJ23392AAAN                                                        | ZNRF1       | FLJ58842AAAF                           |
| ZBTB32      | FLJ82608AAAF                                                        | ZNRF3       | FLJ22057AAAN FLJ39078AAAN              |
|             |                                                                     | ZNRF4       | FLJ25856AAAF                           |
|             |                                                                     | ZSWIM2      | FLJ46125AAAN                           |

**Supplementary Table 1 | Human E3 ubiquitin ligase gene clones which were selected from HuPEX.** We selected 744 genes to be human E3 ubiquitin ligase by a keyword search of the Human Gene and Protein Database (HGPD)<sup>6</sup>, Swiss-Prot database and few papers<sup>7-9</sup>. We have 622 genes to these 744 genes, which were corresponding to 1,172 HuPEX clones containing variant clones.

**Supplementary Table 2. List of antibodies.**

| <b>Antibody</b>    | <b>Clone/catalog #</b> | <b>Distribution source</b> | <b>IB</b> | <b>IF</b> |
|--------------------|------------------------|----------------------------|-----------|-----------|
| acetylated tubulin | 6-11B-1                | Sigma-Aldrich              | -         | x100      |
| Aurora-A           | 1G4                    | Cell Signaling Technology  | x500*     | -         |
| Aurora-A-pT288     | ab58494                | Abcam                      | -         | x100**    |
| Aurora-A-pT288     | C39D8                  | Cell Signaling Technology  | x1,000*   | -         |
| BrdU               | BU-1                   | Millipore                  | -         | x5        |
| COX IV             | 3E 11                  | Cell Signaling Technology  | -         | x250      |
| CP110              | 12780-1-AP             | ProteinTech                | x2,500*   | -         |
| Cul3 (cullin 3)    | Clone 3                | Santa Cruz Biotechnology   | x2,000    | -         |
| cyclin A           | 611268                 | BD Transduction            | -         | x200      |
| DYKDDDDK (Flag)    | 1E 6                   | Wako Chemicals             | x2,500    | -         |
| Flag               | M2                     | Sigma-Aldrich              | x10,000   | -         |
| gamma tubulin      | GTU-88                 | Sigma-Aldrich              | -         | x1,000    |
| gamma tubulin      | T3359                  | Sigma-Aldrich              | -         | x500      |
| GAPDH              | 14C10                  | Cell Signaling Technology  | x2,000    | -         |
| GFP                | Clones 7.1 & 13.1      | Roche                      | x2,000    | -         |
| GST                | B-14                   | Santa Cruz Technology      | x2,000    | -         |
| HA                 | 12CA5                  | Roche                      | x2,000    | -         |
| HA                 | 561-7                  | MBL                        | x2,000    | -         |
| HEF1 (NEDD9)       | 2G9                    | Cell Signaling Technology  | x1,000*   | -         |
| KCTD17             | Rabbit polyAb          | Home-made                  | x20,000*  | -         |
| cytokeratin        | C2562                  | Sigma-Aldrich              | x25,000   | -         |
| Ki-67              | MIB-1                  | Dako                       | -         | x20,000   |
| MBP                | 1G12                   | MBL                        | x2,000    | -         |
| Myc                | MC045                  | Nacalai tesque             | x2,000    | -         |
| Myc                | 9B11                   | Millipore                  | x2,000    | x2,000    |
| Myc                | 4A6                    | Millipore                  | x2,000    | -         |
| ninein             | A301-504A              | Bethyl                     | x2,000*   | -         |
| Odf-2              | HAP001874              | Sigma-Aldrich              | x1,000*   | x100**    |
| Rbx1 (Roc1)        | EPR6850[B]             | Abcam                      | x2,500    | -         |
| trichoplein        | Rabbit polyAb          | Home-made                  | x2,000*   | x200      |
| ubiquitin          | P4D1                   | Cell Signaling Technology  | x1,000*   | -         |
| vimentin           | D21H3                  | Cell Signaling Technology  | x1,000    | -         |

\* diluted in Can Get Signal® immunoreaction Enhanser Solution (TOYOBO, Osaka, Japan)

\*\* diluted in Can Get Signal® immunostain Solution A (TOYOBO, Osaka, Japan)

**Supplementary Table 2 | List of antibodies.** The list shows antibodies with source and conditions of immunoblotting and indirect immunofluorescence.

**Supplementary Table 3. List of siRNAs**

| <b>siRNA</b>      | <b>Target sequence</b> |
|-------------------|------------------------|
| Negativie control | AATTCTCCGAACGTGTCACGT  |
| Tichoplein #1     | AAGGCAGAATGGAGCTCTAAA  |
| Tichoplein #2     | TCCCAGCGCATTCTTTGCAA   |
| Aurora-A #1       | TCCCAGCGCATTCTTTGCAA   |
| Aurora-A #2       | CAGGGCTGCCATATAACCTGA  |
| KCTD17 #1         | CACGCAAATGGTCTCCACCAT  |
| KCTD17 #2         | CCGCATCATCAAAGACCGGAT  |
| KCTD17 #3         | CCCGGGCCTGAGAAGGAAGAA  |
| KCTD17 #4         | AACACTGTCTTTGCAAATGGA  |
| CUL3 #1           | AACAACCTTTCTTCAAACGCTA |
| CUL3 #2           | AACGTCTACAATTTGGGATTA  |
| RBX1 #1           | AAGAAGCGCTTTGAAGTGAAA  |
| RBX1 #2           | CTGCTGTTACCTAATTACAAA  |
| RC3H2 #1          | ACCCAAGACTCCTGTAAGTAA  |
| RC3H2 #2          | CCCGTACAGGTTACCATACCA  |
| RC3H2 #3          | CAGCAGTTGTCTGCCAATCTA  |
| RC3H2 #4          | AAGGAGGAATTTCGGAGTTAT  |
| ZBTB41 #1         | TAGGCGATGGCAGGTCATGAA  |
| ZBTB41 #2         | ATCCGTCATGATCACCTTACA  |
| ZBTB41 #3         | AAGCCTAATGTCTGTAATTAA  |
| ZBTB41 #4         | AGCGCTATTCAACAAAGTCTA  |
| RNF19A #1         | CAGGCTTTAGTGAATAACTTT  |
| RNF19A #2         | AAGATTCACAATCGCTATGAA  |
| RNF19A #3         | AACCTCAATGATAGCAGTTAA  |
| RNF19A #4         | ATCGGTGTTCTTATTATGTTA  |
| CUL7 #1           | CTGCTCTGCCATGGTAAGCAA  |
| CUL7 #2           | CCGGTCCATCTTTCAGCCCTA  |
| CUL7 #3           | CAGCTCGTCTACTTCACGAAA  |
| CUL7 #4           | CTGCAGGTTCTCAGTAGTCGA  |
| RNF165 #1         | CAGCACTATCAGCATTACCTA  |
| RNF165 #2         | CCCACAAGTATAAGAAGCGAA  |
| RNF165 #3         | CCGAGGACGCCAATCAATCAA  |
| RNF165 #4         | ATGGTCGTCCATGAAATCCGA  |



**Supplementary Table 3.** (continued)

| <b>siRNA</b> | <b>Target sequence</b> |
|--------------|------------------------|
| ZBTB40 #1    | CTCCTACGACTCGGCCTATAA  |
| ZBTB40 #2    | CCTGTTGAGGCTGTACCAATA  |
| ZBTB40 #3    | CCGGCGCTGTTGAATGGCGAA  |
| ZBTB40 #4    | ATGATGTACACGGGCAAACCTA |
| NUP43 #1     | GTGCAATAAAGTAGAATTCTA  |
| NUP43 #2     | AAGACCGAATTGAAATCACAA  |
| NUP43 #3     | AGCAAACCTATTTCCAAACTAA |
| NUP43 #4     | CAGGGATAATAATGAACTAAT  |
| ZBTB44_#1    | CACCCGTATTCAGAACCCTAAA |
| ZBTB44_#2    | ACCGGACTACTTAAACCAGGA  |
| ZBTB44_#3    | CTGGCCCATCTGAGACCGGTA  |
| ZBTB44_#4    | CACAGCCACTCTATCAATTAA  |
| RABGEF #1    | AAGCCTCCGAATCAACCGTAA  |
| RABGEF #2    | CAGAAGGTGATAAGTTACTAT  |
| RABGEF #3    | AACCGGCAAACCAGCATTGAA  |
| RABGEF #4    | AACCTCGGGACTATTCATATT  |

**Supplementary Table 3| List of siRNAs.** The list shows target sequences of siRNA.

## Supplementary References

- 1 Inoko, A. *et al.* Trichoplein and Aurora A block aberrant primary cilia assembly in proliferating cells. *J. Cell Biol.* **197**, 391-405 (2012).
- 2 Nishizawa, M. *et al.* Identification of trichoplein, a novel keratin filament-binding protein. *J. Cell Sci.* **118**, 1081-1090 (2005).
- 3 Ibi, M. *et al.* Trichoplein controls microtubule anchoring at the centrosome by binding to Odf2 and ninein. *J. Cell Sci.* **124**, 857-864 (2011).
- 4 Sorokin, S. P. Reconstructions of centriole formation and ciliogenesis in mammalian lungs. *J. Cell Sci.* **3**, 207-230 (1968).
- 5 Sorokin, S. Centrioles and the formation of rudimentary cilia by fibroblasts and smooth muscle cells. *J. Cell Biol.* **15**, 363-377 (1962).
- 6 Maruyama, Y. *et al.* Human Gene and Protein Database (HGPD): a novel database presenting a large quantity of experiment-based results in human proteomics. *Nucleic Acids Res.* **37**, D762-766 (2009).
- 7 Li, W. *et al.* Genome-wide and functional annotation of human E3 ubiquitin ligases identifies MULAN, a mitochondrial E3 that regulates the organelle's dynamics and signaling. *PLoS One* **3**, e1487 (2008).
- 8 Bosu, D. R. & Kipreos, E. T. Cullin-RING ubiquitin ligases: global regulation and activation cycles. *Cell Div.* **3**, 7 (2008).
- 9 Peters, J. M. The anaphase promoting complex/cyclosome: a machine designed to destroy. *Nat. Rev. Mol. Cell. Biol.* **7**, 644-656 (2006).
